# Supplementary material
Source: HighWire-hosted journal article supplement (doi:10.1101/rna.077529.120)
Supplement: Supplemental_Legends.docx [file Supplemental_Legends.docx]

**Supplemental Information.**

**Supplemental Table S1**. Background threshold and sensitivity of the DG-seq pipeline.

**Supplemental Table S2**. Reproducibility of the DG-seq pipeline

**Supplemental Table S3**. Features of the DVGs detected upon RT-seq or RT-PCR-seq on vRNAs extracted from the PA-K635A, PA-R638A or WT viral stocks in experiment #1

**Supplemental Figure S1. Reproducibility and robustness of the read count threshold**. Two control experiments performing RT-seq or RT-PCR-seq on equimolar mixes of eight full-length *in vitro* transcribed (IVT) influenza vRNAs were done. Expt #A (3 RT-seq and 2 RT-PCR-seq mixes) corresponds to the initial experiment shown in Figure 1C and Expt #B (2 RT-seq and 2 RT-PCR-seq mixes) is a second independent control experiment. **A–B**. Each point represents the 99th percentile of raw counts for deletions (Raw99) for a given segment in a given IVT mix. **A**. Distribution of Raw99 in IVT mixes from Expt #A and Expt #B (after pooling deletions detected by RT-seq and RT-PCR-seq). **B**. Distribution of Raw99 in IVT mixes analyzed by RT-seq and RT-PCR-seq (after pooling deletions detected in Expt #A and Expt #B). n.s., not significant (Mann-Whitney U test). **C–D**. Each point represents the 99th percentile of raw counts (Raw99) or normalized counts (Normalized99) for a given segment in a given IVT mix, and was plotted as a function of the coverage depth. r and p values were obtained using Pearson’s correlation.

**Supplemental Figure S2. DG-seq analysis of RNA-seq data from Alnaji *et al.* relative to four DVG-enriched viral stocks.** RNA-seq data from the earliest high-MOI passages of the indicated viruses were analyzed with the DG-seq pipeline (P6 for A/Cal07; P1 for A/NC99; P4 for A/Perth09 and P7 for B/Lee). **A**. Numbers of distinct DVGs detected within each genome segment for two lineages (L1 and L2) of the indicated viruses (to be compared to Figure 9B of Alnaji *et al.*). **B**. Parallel coordinate diagrams of the specific locations of DVG junctions found in the PB1 and PA segments of lineage 1 of the indicated viruses (to be compared to Figure 9B of Alnaji *et al.*).

**Supplemental Figure S3. Comparison of the DG-seq and ViReMa pipelines (related to Figure 7).** DVGs detected from WT, PA-K635A and PA-R638A samples obtained after RT-seq (**A**) or RT-PCR-seq (**B**) and upon DG-seq or ViReMa analysis were compared for the PA, PB1 and PB2 segments.Venn diagrams showing the numbers of shared (purple) versus unique detected DVGs between DG-seq (pink) and ViReMa (blue) pipelines are shown.

**Supplemental File S1**. DG-seq functions script

**Supplemental File S2**. DG-seq example script
