# Supplementary material
Source: HighWire-hosted journal article supplement (doi:10.1101/rna.077529.120)
Supplement: Supplemental_Table_S1.xlsx [file Supplemental_Table_S1.xlsx]

## Sheet: Table S1 Description
Supplemental Table S1 (related to Figure 1 and Figure 3) ∣ Background threshold and sensitivity of the DG-seq pipeline.
Tab "IVT-vRNAs RT-seq" (related to Figure 1D) ∣ DG-seq data obtained upon RT-seq on a mix of eight in vitro transcribed influenza vRNAs
Tab "IVT-vRNAs RT-PCR-seq" (related to Figure 1D) ∣ DG-seq data obtained upon RT-PCR-seq on a mix of eight in vitro transcribed influenza vRNAs
Tab "IVT-vRNAs with pseudo-DVGs" (related to Figure 3) ∣ DG-seq data obtained upon RT-seq or RT-PCR-seq of mixes of eight in vitro transcribed vRNAs containing pseudo-DVGs of distinct sizes and frequencies

## Sheet: IVT-vRNAs RT–seq
Count	Breakpoint start	Breakpoint end	Frequency	Segment
1	344	471	3.13e-05	HA
1	346	630	3.13e-05	HA
1	447	750	3.13e-05	HA
1	566	824	3.13e-05	HA
2	592	855	6.27e-05	HA
2	525	1125	6.27e-05	HA
1	679	1163	3.13e-05	HA
10	699	1026	0.000313336	HA
6	702	789	0.000188002	HA
2	700	1001	6.27e-05	HA
1	752	929	3.13e-05	HA
1	709	794	3.13e-05	HA
1	769	1326	3.13e-05	HA
1	923	1539	3.13e-05	HA
1	939	1026	3.13e-05	HA
1	1002	1584	3.13e-05	HA
1	1290	1366	3.13e-05	HA
1	1341	1444	3.13e-05	HA
1	488	500	3.13e-05	HA
1	696	729	3.13e-05	HA
1	862	899	3.13e-05	HA
1	915	926	3.13e-05	HA
1	909	934	3.13e-05	HA
1	1049	1064	3.13e-05	HA
1	1068	1085	3.13e-05	HA
1	1109	1121	3.13e-05	HA
1	88	650	3.47e-05	M
1	369	651	3.47e-05	M
1	353	428	3.47e-05	M
1	325	425	3.47e-05	M
1	391	616	3.47e-05	M
1	421	480	3.47e-05	M
1	511	653	3.47e-05	M
1	632	834	3.47e-05	M
1	722	838	3.47e-05	M
2	217	256	6.95e-05	M
1	223	244	3.47e-05	M
1	225	239	3.47e-05	M
1	289	351	2.92e-05	NA
1	425	464	2.92e-05	NA
1	532	714	2.92e-05	NA
1	567	991	2.92e-05	NA
1	642	1323	2.92e-05	NA
1	587	702	2.92e-05	NA
1	677	807	2.92e-05	NA
1	722	977	2.92e-05	NA
1	711	991	2.92e-05	NA
1	823	870	2.92e-05	NA
2	846	1113	5.84e-05	NA
1	875	1076	2.92e-05	NA
1	973	1150	2.92e-05	NA
2	1158	1282	5.84e-05	NA
1	1237	1309	2.92e-05	NA
1	127	138	2.92e-05	NA
1	325	338	2.92e-05	NA
1	320	334	2.92e-05	NA
1	387	401	2.92e-05	NA
1	393	409	2.92e-05	NA
1	416	433	2.92e-05	NA
1	702	720	2.92e-05	NA
1	729	753	2.92e-05	NA
1	835	877	2.92e-05	NA
1	845	881	2.92e-05	NA
1	864	887	2.92e-05	NA
2	871	889	5.84e-05	NA
1	879	892	2.92e-05	NA
1	976	1004	2.92e-05	NA
1	1113	1124	2.92e-05	NA
1	1143	1171	2.92e-05	NA
1	56	868	3.45e-05	NP
1	143	614	3.45e-05	NP
2	201	1088	6.91e-05	NP
2	223	253	6.91e-05	NP
3	345	1386	0.000103609	NP
1	423	1161	3.45e-05	NP
1	640	760	3.45e-05	NP
1	774	1365	3.45e-05	NP
3	841	1187	0.000103609	NP
1	874	1049	3.45e-05	NP
1	961	1140	3.45e-05	NP
1	1215	1366	3.45e-05	NP
1	1280	1476	3.45e-05	NP
1	563	575	3.45e-05	NP
1	607	648	3.45e-05	NP
1	632	645	3.45e-05	NP
1	710	760	3.45e-05	NP
1	970	983	3.45e-05	NP
1	1030	1042	3.45e-05	NP
1	482	540	0.000184712	NS
2	58	1961	7.8e-05	PB1
1	184	354	3.9e-05	PB1
1	236	2117	3.9e-05	PB1
1	302	2206	3.9e-05	PB1
4	437	2098	0.000156094	PB1
2	456	697	7.8e-05	PB1
9	498	2215	0.000351211	PB1
1	578	612	3.9e-05	PB1
1	565	2243	3.9e-05	PB1
1	509	2191	3.9e-05	PB1
1	618	2164	3.9e-05	PB1
2	605	2247	7.8e-05	PB1
2	620	1714	7.8e-05	PB1
2	660	1321	7.8e-05	PB1
1	653	935	3.9e-05	PB1
1	647	2172	3.9e-05	PB1
2	887	1357	7.8e-05	PB1
1	842	2168	3.9e-05	PB1
1	830	1877	3.9e-05	PB1
1	881	1081	3.9e-05	PB1
1	960	1002	3.9e-05	PB1
6	1080	1394	0.00023414	PB1
1	1071	1322	3.9e-05	PB1
2	1163	1345	7.8e-05	PB1
7	1187	1360	0.000273164	PB1
1	1172	1346	3.9e-05	PB1
1	1183	1963	3.9e-05	PB1
1	1489	1742	3.9e-05	PB1
1	1507	1841	3.9e-05	PB1
1	1507	1852	3.9e-05	PB1
3	1579	1848	0.00011707	PB1
1	1541	1824	3.9e-05	PB1
1	1547	1853	3.9e-05	PB1
1	1543	1845	3.9e-05	PB1
1	1586	1786	3.9e-05	PB1
1	1624	1955	3.9e-05	PB1
1	1640	1971	3.9e-05	PB1
1	1773	2014	3.9e-05	PB1
1	132	144	3.9e-05	PB1
1	596	630	3.9e-05	PB1
1	754	770	3.9e-05	PB1
1	1311	1322	3.9e-05	PB1
1	1538	1554	3.9e-05	PB1
1	1966	2012	3.9e-05	PB1
1	2054	2070	3.9e-05	PB1
3	136	2125	0.000130812	PB2
1	219	1908	4.36e-05	PB2
1	236	2092	4.36e-05	PB2
1	281	2145	4.36e-05	PB2
1	294	2230	4.36e-05	PB2
1	344	1912	4.36e-05	PB2
1	370	2035	4.36e-05	PB2
1	548	1984	4.36e-05	PB2
1	659	1056	4.36e-05	PB2
1	807	1024	4.36e-05	PB2
1	828	936	4.36e-05	PB2
2	953	1235	8.72e-05	PB2
1	976	1460	4.36e-05	PB2
1	985	1897	4.36e-05	PB2
1	1123	1168	4.36e-05	PB2
2	1136	1199	8.72e-05	PB2
1	1138	1204	4.36e-05	PB2
1	1186	1635	4.36e-05	PB2
1	1172	1466	4.36e-05	PB2
1	1304	1398	4.36e-05	PB2
1	1426	1934	4.36e-05	PB2
1	1445	1666	4.36e-05	PB2
1	1651	1695	4.36e-05	PB2
1	1838	2059	4.36e-05	PB2
1	1945	2099	4.36e-05	PB2
1	2055	2125	4.36e-05	PB2
1	2117	2213	4.36e-05	PB2
1	2063	2211	4.36e-05	PB2
1	2043	2212	4.36e-05	PB2
1	2043	2213	4.36e-05	PB2
1	735	747	4.36e-05	PB2
2	1130	1158	8.72e-05	PB2
1	1130	1154	4.36e-05	PB2
1	1139	1155	4.36e-05	PB2
1	1609	1665	4.36e-05	PB2
1	1640	1665	4.36e-05	PB2
1	1681	1725	4.36e-05	PB2
1	2009	2022	4.36e-05	PB2
1	2040	2077	4.36e-05	PB2
1	176	1168	2.69e-05	HA
1	188	791	2.69e-05	HA
1	257	1288	2.69e-05	HA
2	259	838	5.38e-05	HA
1	327	829	2.69e-05	HA
1	273	355	2.69e-05	HA
2	344	471	5.38e-05	HA
1	366	1136	2.69e-05	HA
1	386	495	2.69e-05	HA
1	448	527	2.69e-05	HA
1	487	948	2.69e-05	HA
1	526	661	2.69e-05	HA
1	613	933	2.69e-05	HA
1	641	1271	2.69e-05	HA
1	635	738	2.69e-05	HA
1	676	1220	2.69e-05	HA
1	616	1133	2.69e-05	HA
35	699	1026	0.000941178	HA
1	616	874	2.69e-05	HA
3	700	1001	8.07e-05	HA
1	709	796	2.69e-05	HA
1	648	859	2.69e-05	HA
3	709	966	8.07e-05	HA
1	706	1033	2.69e-05	HA
2	709	922	5.38e-05	HA
1	697	905	2.69e-05	HA
2	702	789	5.38e-05	HA
1	697	1196	2.69e-05	HA
1	709	829	2.69e-05	HA
1	833	1366	2.69e-05	HA
2	976	1302	5.38e-05	HA
1	1096	1151	2.69e-05	HA
2	1097	1288	5.38e-05	HA
1	1111	1577	2.69e-05	HA
2	1153	1677	5.38e-05	HA
1	1236	1564	2.69e-05	HA
1	1214	1492	2.69e-05	HA
1	1575	1644	2.69e-05	HA
1	282	300	2.69e-05	HA
1	529	560	2.69e-05	HA
1	1079	1104	2.69e-05	HA
1	1097	1119	2.69e-05	HA
1	1098	1116	2.69e-05	HA
1	1099	1126	2.69e-05	HA
3	225	280	6.86e-05	M
1	353	407	2.29e-05	M
1	407	682	2.29e-05	M
3	389	477	6.86e-05	M
1	391	573	2.29e-05	M
1	478	553	2.29e-05	M
1	511	653	2.29e-05	M
8	632	834	0.000182933	M
1	615	728	2.29e-05	M
1	646	737	2.29e-05	M
4	634	827	9.15e-05	M
1	662	735	2.29e-05	M
2	637	816	4.57e-05	M
1	722	838	2.29e-05	M
1	90	101	2.29e-05	M
1	217	256	2.29e-05	M
1	223	244	2.29e-05	M
4	225	239	9.15e-05	M
1	211	238	2.29e-05	M
1	397	410	2.29e-05	M
1	575	587	2.29e-05	M
1	894	929	2.29e-05	M
1	255	1105	2.5e-05	NA
1	351	802	2.5e-05	NA
2	350	529	5e-05	NA
1	424	747	2.5e-05	NA
6	401	483	0.000149967	NA
1	529	802	2.5e-05	NA
1	556	1278	2.5e-05	NA
1	567	991	2.5e-05	NA
2	658	803	5e-05	NA
1	641	1137	2.5e-05	NA
1	622	774	2.5e-05	NA
2	708	831	5e-05	NA
1	722	994	2.5e-05	NA
1	709	982	2.5e-05	NA
1	718	1237	2.5e-05	NA
2	711	991	5e-05	NA
1	846	1113	2.5e-05	NA
1	845	998	2.5e-05	NA
4	933	1041	0.0001	NA
1	875	1076	2.5e-05	NA
1	943	1051	2.5e-05	NA
1	922	976	2.5e-05	NA
1	973	1150	2.5e-05	NA
1	929	1128	2.5e-05	NA
1	1011	1095	2.5e-05	NA
1	1028	1317	2.5e-05	NA
1	1078	1172	2.5e-05	NA
2	1116	1282	5e-05	NA
1	1126	1226	2.5e-05	NA
1	1210	1256	2.5e-05	NA
1	235	252	2.5e-05	NA
1	280	295	2.5e-05	NA
1	419	437	2.5e-05	NA
1	385	401	2.5e-05	NA
1	405	427	2.5e-05	NA
1	440	471	2.5e-05	NA
1	567	579	2.5e-05	NA
2	535	580	5e-05	NA
1	709	729	2.5e-05	NA
1	842	868	2.5e-05	NA
1	871	889	2.5e-05	NA
3	864	887	7.5e-05	NA
1	956	976	2.5e-05	NA
1	1182	1196	2.5e-05	NA
1	1270	1281	2.5e-05	NA
2	81	1156	5.35e-05	NP
1	215	1404	2.67e-05	NP
2	297	1425	5.35e-05	NP
1	288	1413	2.67e-05	NP
1	281	384	2.67e-05	NP
7	345	1386	0.000187195	NP
1	358	1411	2.67e-05	NP
1	369	610	2.67e-05	NP
1	407	467	2.67e-05	NP
1	351	1218	2.67e-05	NP
1	426	543	2.67e-05	NP
4	399	457	0.000106968	NP
1	438	827	2.67e-05	NP
1	516	618	2.67e-05	NP
1	482	658	2.67e-05	NP
1	499	1438	2.67e-05	NP
1	517	675	2.67e-05	NP
1	530	1408	2.67e-05	NP
1	570	662	2.67e-05	NP
1	585	742	2.67e-05	NP
1	668	1446	2.67e-05	NP
1	760	888	2.67e-05	NP
1	829	871	2.67e-05	NP
2	841	1187	5.35e-05	NP
2	860	1172	5.35e-05	NP
1	782	1005	2.67e-05	NP
1	888	1498	2.67e-05	NP
1	874	1027	2.67e-05	NP
1	961	1140	2.67e-05	NP
1	885	1164	2.67e-05	NP
1	1001	1187	2.67e-05	NP
1	924	1223	2.67e-05	NP
1	1221	1429	2.67e-05	NP
1	1250	1443	2.67e-05	NP
1	1241	1483	2.67e-05	NP
1	1294	1356	2.67e-05	NP
1	1244	1382	2.67e-05	NP
1	426	478	2.67e-05	NP
1	607	648	2.67e-05	NP
1	627	674	2.67e-05	NP
1	670	683	2.67e-05	NP
1	627	640	2.67e-05	NP
1	801	814	2.67e-05	NP
2	970	983	5.35e-05	NP
1	934	950	2.67e-05	NP
1	1093	1105	2.67e-05	NP
1	482	540	0.00011533	NS
1	392	416	0.00011533	NS
16	58	1961	0.00057049	PB1
1	72	1979	3.57e-05	PB1
5	181	2074	0.000178278	PB1
1	168	1749	3.57e-05	PB1
1	142	2004	3.57e-05	PB1
1	171	1893	3.57e-05	PB1
1	133	1936	3.57e-05	PB1
2	177	2138	7.13e-05	PB1
1	174	1431	3.57e-05	PB1
1	194	2109	3.57e-05	PB1
1	235	2017	3.57e-05	PB1
1	206	1544	3.57e-05	PB1
1	189	315	3.57e-05	PB1
1	174	1990	3.57e-05	PB1
1	232	1970	3.57e-05	PB1
3	205	2219	0.000106967	PB1
1	218	1845	3.57e-05	PB1
1	295	542	3.57e-05	PB1
1	295	2162	3.57e-05	PB1
4	296	534	0.000142622	PB1
1	342	2073	3.57e-05	PB1
1	390	458	3.57e-05	PB1
1	403	2210	3.57e-05	PB1
3	437	2098	0.000106967	PB1
1	472	2282	3.57e-05	PB1
4	456	697	0.000142622	PB1
28	498	2215	0.000998357	PB1
1	443	2163	3.57e-05	PB1
1	533	1939	3.57e-05	PB1
1	477	1656	3.57e-05	PB1
1	553	2245	3.57e-05	PB1
2	555	1857	7.13e-05	PB1
1	559	933	3.57e-05	PB1
1	563	1572	3.57e-05	PB1
2	584	2185	7.13e-05	PB1
2	633	2248	7.13e-05	PB1
1	597	1310	3.57e-05	PB1
1	620	1714	3.57e-05	PB1
1	710	1215	3.57e-05	PB1
1	658	2079	3.57e-05	PB1
1	665	801	3.57e-05	PB1
1	748	1575	3.57e-05	PB1
2	746	1897	7.13e-05	PB1
2	706	2058	7.13e-05	PB1
1	746	2101	3.57e-05	PB1
1	783	1263	3.57e-05	PB1
1	737	1096	3.57e-05	PB1
1	830	1877	3.57e-05	PB1
10	887	1357	0.000356556	PB1
6	889	1356	0.000213934	PB1
1	888	1624	3.57e-05	PB1
4	1084	1486	0.000142622	PB1
32	1080	1394	0.00114098	PB1
1	1075	1861	3.57e-05	PB1
1	1078	1857	3.57e-05	PB1
2	1153	1743	7.13e-05	PB1
1	1114	1826	3.57e-05	PB1
1	1103	1990	3.57e-05	PB1
2	1166	1947	7.13e-05	PB1
3	1187	1360	0.000106967	PB1
1	1191	1339	3.57e-05	PB1
1	1170	1398	3.57e-05	PB1
1	1235	2224	3.57e-05	PB1
1	1222	2100	3.57e-05	PB1
1	1244	1768	3.57e-05	PB1
1	1379	2101	3.57e-05	PB1
1	1427	1901	3.57e-05	PB1
1	1429	1843	3.57e-05	PB1
1	1511	1844	3.57e-05	PB1
5	1544	1804	0.000178278	PB1
7	1541	1824	0.000249589	PB1
1	1547	1853	3.57e-05	PB1
1	1544	1863	3.57e-05	PB1
1	1489	1742	3.57e-05	PB1
3	1579	1848	0.000106967	PB1
1	1542	1860	3.57e-05	PB1
2	1640	1971	7.13e-05	PB1
2	1644	1810	7.13e-05	PB1
1	1836	2012	3.57e-05	PB1
1	1896	2101	3.57e-05	PB1
1	2055	2187	3.57e-05	PB1
1	62	79	3.57e-05	PB1
1	258	273	3.57e-05	PB1
1	519	531	3.57e-05	PB1
1	480	496	3.57e-05	PB1
2	609	634	7.13e-05	PB1
1	642	664	3.57e-05	PB1
1	789	826	3.57e-05	PB1
1	770	787	3.57e-05	PB1
1	1123	1138	3.57e-05	PB1
2	1162	1222	7.13e-05	PB1
1	1489	1500	3.57e-05	PB1
1	1632	1645	3.57e-05	PB1
2	1932	1962	7.13e-05	PB1
1	144	2007	3.99e-05	PB2
1	155	700	3.99e-05	PB2
1	146	1742	3.99e-05	PB2
1	170	2052	3.99e-05	PB2
1	154	2050	3.99e-05	PB2
1	136	2125	3.99e-05	PB2
1	173	784	3.99e-05	PB2
1	221	781	3.99e-05	PB2
2	353	2129	7.97e-05	PB2
1	357	2146	3.99e-05	PB2
1	317	1721	3.99e-05	PB2
1	333	2130	3.99e-05	PB2
1	338	2229	3.99e-05	PB2
1	327	1738	3.99e-05	PB2
1	331	2138	3.99e-05	PB2
1	335	437	3.99e-05	PB2
1	405	516	3.99e-05	PB2
1	426	1420	3.99e-05	PB2
1	412	2269	3.99e-05	PB2
1	397	2177	3.99e-05	PB2
1	451	2072	3.99e-05	PB2
1	421	1822	3.99e-05	PB2
2	482	2052	7.97e-05	PB2
1	487	1036	3.99e-05	PB2
1	587	652	3.99e-05	PB2
1	631	690	3.99e-05	PB2
2	647	2239	7.97e-05	PB2
1	648	1044	3.99e-05	PB2
1	777	1956	3.99e-05	PB2
2	829	1051	7.97e-05	PB2
1	872	1632	3.99e-05	PB2
1	895	2068	3.99e-05	PB2
1	948	1004	3.99e-05	PB2
1	1045	1452	3.99e-05	PB2
1	1042	1192	3.99e-05	PB2
2	1064	2206	7.97e-05	PB2
1	1100	1374	3.99e-05	PB2
1	1136	1199	3.99e-05	PB2
1	1131	1194	3.99e-05	PB2
3	1244	1453	0.000119552	PB2
1	1353	2210	3.99e-05	PB2
1	1515	2145	3.99e-05	PB2
1	1516	2199	3.99e-05	PB2
3	1517	1931	0.000119552	PB2
1	1472	1959	3.99e-05	PB2
1	1591	1837	3.99e-05	PB2
1	1541	2140	3.99e-05	PB2
1	1651	1695	3.99e-05	PB2
1	1609	1665	3.99e-05	PB2
1	1831	1941	3.99e-05	PB2
1	1811	1944	3.99e-05	PB2
1	2055	2125	3.99e-05	PB2
1	2023	2093	3.99e-05	PB2
1	2035	2103	3.99e-05	PB2
1	1026	1038	3.99e-05	PB2
1	1133	1155	3.99e-05	PB2
3	1130	1158	0.000119552	PB2
2	1130	1154	7.97e-05	PB2
1	1162	1190	3.99e-05	PB2
1	1640	1665	3.99e-05	PB2
1	1655	1676	3.99e-05	PB2
1	1855	1880	3.99e-05	PB2
1	2064	2109	3.99e-05	PB2
1	109	578	2.43e-05	HA
1	102	830	2.43e-05	HA
1	113	1218	2.43e-05	HA
1	203	572	2.43e-05	HA
1	259	838	2.43e-05	HA
1	238	497	2.43e-05	HA
1	246	474	2.43e-05	HA
1	279	666	2.43e-05	HA
1	259	449	2.43e-05	HA
1	301	361	2.43e-05	HA
3	327	829	7.28e-05	HA
2	322	516	4.85e-05	HA
1	298	683	2.43e-05	HA
2	326	514	4.85e-05	HA
7	386	495	0.000169887	HA
1	356	969	2.43e-05	HA
1	344	471	2.43e-05	HA
1	440	1421	2.43e-05	HA
2	450	1159	4.85e-05	HA
1	494	587	2.43e-05	HA
1	526	1506	2.43e-05	HA
1	560	849	2.43e-05	HA
2	609	929	4.85e-05	HA
1	660	1506	2.43e-05	HA
1	610	835	2.43e-05	HA
1	618	1612	2.43e-05	HA
3	700	1001	7.28e-05	HA
2	699	1026	4.85e-05	HA
1	725	789	2.43e-05	HA
3	666	838	7.28e-05	HA
1	665	893	2.43e-05	HA
2	677	1412	4.85e-05	HA
1	769	1326	2.43e-05	HA
1	723	814	2.43e-05	HA
1	803	1473	2.43e-05	HA
6	920	965	0.000145617	HA
6	924	968	0.000145617	HA
1	899	984	2.43e-05	HA
1	1039	1134	2.43e-05	HA
1	1013	1312	2.43e-05	HA
3	1012	1089	7.28e-05	HA
1	1039	1137	2.43e-05	HA
6	1096	1151	0.000145617	HA
1	1096	1570	2.43e-05	HA
2	1111	1577	4.85e-05	HA
1	1097	1288	2.43e-05	HA
2	1094	1604	4.85e-05	HA
1	1115	1289	2.43e-05	HA
2	1234	1497	4.85e-05	HA
1	1214	1492	2.43e-05	HA
1	1236	1564	2.43e-05	HA
1	1231	1368	2.43e-05	HA
1	1370	1497	2.43e-05	HA
1	1461	1519	2.43e-05	HA
1	1471	1657	2.43e-05	HA
1	1507	1571	2.43e-05	HA
1	86	103	2.43e-05	HA
1	384	397	2.43e-05	HA
1	536	567	2.43e-05	HA
1	486	530	2.43e-05	HA
1	529	560	2.43e-05	HA
1	539	586	2.43e-05	HA
1	648	675	2.43e-05	HA
1	763	776	2.43e-05	HA
1	910	921	2.43e-05	HA
1	1030	1041	2.43e-05	HA
1	1015	1060	2.43e-05	HA
1	1031	1043	2.43e-05	HA
5	1097	1119	0.000121348	HA
1	1109	1126	2.43e-05	HA
1	1431	1449	2.43e-05	HA
1	1553	1596	2.43e-05	HA
1	111	342	1.65e-05	M
1	259	418	1.65e-05	M
4	389	477	6.61e-05	M
1	379	637	1.65e-05	M
2	456	639	3.31e-05	M
1	427	755	1.65e-05	M
4	484	638	6.61e-05	M
11	478	553	0.000181864	M
1	516	559	1.65e-05	M
2	511	653	3.31e-05	M
15	632	834	0.000247996	M
9	634	827	0.000148797	M
2	632	812	3.31e-05	M
1	725	888	1.65e-05	M
2	894	929	3.31e-05	M
1	101	112	1.65e-05	M
1	192	203	1.65e-05	M
1	395	421	1.65e-05	M
1	406	428	1.65e-05	M
1	457	471	1.65e-05	M
1	631	644	1.65e-05	M
1	72	604	2.4e-05	NA
1	80	1081	2.4e-05	NA
1	118	293	2.4e-05	NA
1	228	460	2.4e-05	NA
1	280	532	2.4e-05	NA
15	401	483	0.000359913	NA
1	354	1098	2.4e-05	NA
1	402	485	2.4e-05	NA
1	390	531	2.4e-05	NA
1	471	1107	2.4e-05	NA
1	524	567	2.4e-05	NA
1	534	1256	2.4e-05	NA
5	535	580	0.000119971	NA
2	532	714	4.8e-05	NA
1	491	776	2.4e-05	NA
1	567	991	2.4e-05	NA
1	556	1160	2.4e-05	NA
1	561	1070	2.4e-05	NA
1	529	802	2.4e-05	NA
1	625	994	2.4e-05	NA
1	641	1137	2.4e-05	NA
1	700	1107	2.4e-05	NA
5	718	1237	0.000119971	NA
2	657	777	4.8e-05	NA
1	709	982	2.4e-05	NA
1	715	1211	2.4e-05	NA
1	702	976	2.4e-05	NA
1	708	831	2.4e-05	NA
1	836	1307	2.4e-05	NA
2	846	1113	4.8e-05	NA
1	814	1260	2.4e-05	NA
2	875	1076	4.8e-05	NA
1	913	1044	2.4e-05	NA
1	956	1143	2.4e-05	NA
1	1033	1316	2.4e-05	NA
1	1038	1147	2.4e-05	NA
4	1039	1081	9.6e-05	NA
2	1158	1282	4.8e-05	NA
1	52	69	2.4e-05	NA
1	384	399	2.4e-05	NA
1	477	493	2.4e-05	NA
1	543	555	2.4e-05	NA
1	573	593	2.4e-05	NA
1	585	597	2.4e-05	NA
2	609	622	4.8e-05	NA
1	698	722	2.4e-05	NA
1	787	800	2.4e-05	NA
1	849	862	2.4e-05	NA
1	864	887	2.4e-05	NA
2	939	958	4.8e-05	NA
1	1013	1024	2.4e-05	NA
1	1012	1027	2.4e-05	NA
1	1224	1268	2.4e-05	NA
1	32	1249	2.15e-05	NP
1	84	1285	2.15e-05	NP
1	115	1259	2.15e-05	NP
1	120	1351	2.15e-05	NP
1	76	1116	2.15e-05	NP
2	197	699	4.31e-05	NP
1	143	614	2.15e-05	NP
1	203	1336	2.15e-05	NP
2	219	970	4.31e-05	NP
2	255	1480	4.31e-05	NP
1	197	1390	2.15e-05	NP
1	229	1117	2.15e-05	NP
1	289	524	2.15e-05	NP
1	284	685	2.15e-05	NP
1	231	1423	2.15e-05	NP
2	252	1432	4.31e-05	NP
1	268	1424	2.15e-05	NP
1	297	1425	2.15e-05	NP
1	262	1126	2.15e-05	NP
1	345	615	2.15e-05	NP
9	345	1386	0.000193811	NP
1	353	1456	2.15e-05	NP
1	366	811	2.15e-05	NP
1	420	1432	2.15e-05	NP
1	361	673	2.15e-05	NP
1	454	614	2.15e-05	NP
1	406	1424	2.15e-05	NP
1	409	1392	2.15e-05	NP
3	476	614	6.46e-05	NP
1	522	652	2.15e-05	NP
3	517	675	6.46e-05	NP
1	595	1496	2.15e-05	NP
2	604	752	4.31e-05	NP
1	555	1231	2.15e-05	NP
2	613	1385	4.31e-05	NP
1	667	1426	2.15e-05	NP
1	670	769	2.15e-05	NP
1	655	1226	2.15e-05	NP
1	710	1394	2.15e-05	NP
1	671	1187	2.15e-05	NP
1	683	1188	2.15e-05	NP
1	695	876	2.15e-05	NP
1	774	843	2.15e-05	NP
1	738	983	2.15e-05	NP
1	844	1223	2.15e-05	NP
1	844	1188	2.15e-05	NP
2	841	1187	4.31e-05	NP
1	880	1030	2.15e-05	NP
3	874	1027	6.46e-05	NP
1	915	1057	2.15e-05	NP
3	860	1172	6.46e-05	NP
1	889	1063	2.15e-05	NP
1	874	1052	2.15e-05	NP
1	1090	1446	2.15e-05	NP
1	1198	1333	2.15e-05	NP
1	1238	1342	2.15e-05	NP
3	1241	1483	6.46e-05	NP
1	1241	1488	2.15e-05	NP
1	1242	1421	2.15e-05	NP
1	1246	1415	2.15e-05	NP
1	1294	1356	2.15e-05	NP
1	1291	1372	2.15e-05	NP
1	320	355	2.15e-05	NP
1	542	580	2.15e-05	NP
1	611	670	2.15e-05	NP
1	607	648	2.15e-05	NP
3	970	983	6.46e-05	NP
1	941	953	2.15e-05	NP
1	1021	1032	2.15e-05	NP
1	998	1009	2.15e-05	NP
2	1238	1307	4.31e-05	NP
1	1307	1332	2.15e-05	NP
2	97	365	0.000179418	NS
1	113	364	8.97e-05	NS
1	360	526	8.97e-05	NS
23	58	1961	0.00057381	PB1
1	85	2074	2.49e-05	PB1
1	60	1773	2.49e-05	PB1
1	138	2089	2.49e-05	PB1
1	137	1944	2.49e-05	PB1
1	90	306	2.49e-05	PB1
1	181	1988	2.49e-05	PB1
1	205	2019	2.49e-05	PB1
5	181	2074	0.000124741	PB1
1	181	1944	2.49e-05	PB1
1	193	1898	2.49e-05	PB1
2	181	888	4.99e-05	PB1
1	179	1862	2.49e-05	PB1
1	217	1644	2.49e-05	PB1
1	187	1587	2.49e-05	PB1
1	202	2094	2.49e-05	PB1
7	228	2194	0.000174638	PB1
1	200	2214	2.49e-05	PB1
1	218	1905	2.49e-05	PB1
1	265	2052	2.49e-05	PB1
1	276	1865	2.49e-05	PB1
1	194	1740	2.49e-05	PB1
1	224	1012	2.49e-05	PB1
15	296	534	0.000374224	PB1
1	243	2149	2.49e-05	PB1
1	298	452	2.49e-05	PB1
2	244	2139	4.99e-05	PB1
1	287	1749	2.49e-05	PB1
1	316	1963	2.49e-05	PB1
1	289	2220	2.49e-05	PB1
1	302	519	2.49e-05	PB1
1	333	2218	2.49e-05	PB1
1	334	404	2.49e-05	PB1
1	390	458	2.49e-05	PB1
12	437	2098	0.000299379	PB1
1	413	503	2.49e-05	PB1
1	414	2195	2.49e-05	PB1
1	433	1972	2.49e-05	PB1
1	495	2274	2.49e-05	PB1
48	498	2215	0.00119752	PB1
1	416	2055	2.49e-05	PB1
8	456	697	0.000199586	PB1
1	486	2221	2.49e-05	PB1
1	499	2216	2.49e-05	PB1
1	492	2057	2.49e-05	PB1
1	502	932	2.49e-05	PB1
1	525	2187	2.49e-05	PB1
2	555	1857	4.99e-05	PB1
1	548	2151	2.49e-05	PB1
1	552	2074	2.49e-05	PB1
2	573	2205	4.99e-05	PB1
1	587	1071	2.49e-05	PB1
1	658	1076	2.49e-05	PB1
1	601	1619	2.49e-05	PB1
1	620	1714	2.49e-05	PB1
1	692	1293	2.49e-05	PB1
1	667	1600	2.49e-05	PB1
3	678	1825	7.48e-05	PB1
1	713	2098	2.49e-05	PB1
1	751	2124	2.49e-05	PB1
3	746	1897	7.48e-05	PB1
1	734	1802	2.49e-05	PB1
1	747	799	2.49e-05	PB1
1	771	1522	2.49e-05	PB1
1	842	2168	2.49e-05	PB1
1	842	1988	2.49e-05	PB1
1	832	1371	2.49e-05	PB1
5	889	1356	0.000124741	PB1
9	887	1357	0.000224534	PB1
9	888	1624	0.000224534	PB1
1	911	1856	2.49e-05	PB1
1	1034	1847	2.49e-05	PB1
27	1080	1394	0.000673603	PB1
5	1114	1826	0.000124741	PB1
1	1076	2152	2.49e-05	PB1
2	1075	1861	4.99e-05	PB1
3	1146	1540	7.48e-05	PB1
5	1187	1360	0.000124741	PB1
1	1183	2140	2.49e-05	PB1
1	1164	1258	2.49e-05	PB1
4	1187	1371	9.98e-05	PB1
1	1163	1345	2.49e-05	PB1
1	1144	2027	2.49e-05	PB1
1	1174	1821	2.49e-05	PB1
1	1166	1947	2.49e-05	PB1
1	1192	1365	2.49e-05	PB1
2	1190	1359	4.99e-05	PB1
1	1229	2206	2.49e-05	PB1
1	1247	1339	2.49e-05	PB1
1	1401	2054	2.49e-05	PB1
1	1410	1918	2.49e-05	PB1
1	1443	1863	2.49e-05	PB1
1	1473	1627	2.49e-05	PB1
1	1511	1844	2.49e-05	PB1
11	1541	1824	0.000274431	PB1
3	1544	1804	7.48e-05	PB1
1	1533	1865	2.49e-05	PB1
1	1571	1642	2.49e-05	PB1
2	1542	1860	4.99e-05	PB1
1	1644	1810	2.49e-05	PB1
1	1579	1848	2.49e-05	PB1
3	1640	1971	7.48e-05	PB1
1	1754	2049	2.49e-05	PB1
1	1769	1909	2.49e-05	PB1
1	1762	2152	2.49e-05	PB1
1	1853	2071	2.49e-05	PB1
1	1962	2126	2.49e-05	PB1
1	2006	2081	2.49e-05	PB1
1	62	79	2.49e-05	PB1
1	160	173	2.49e-05	PB1
1	485	501	2.49e-05	PB1
1	506	526	2.49e-05	PB1
1	480	496	2.49e-05	PB1
1	586	598	2.49e-05	PB1
1	542	558	2.49e-05	PB1
2	642	664	4.99e-05	PB1
1	717	740	2.49e-05	PB1
1	781	793	2.49e-05	PB1
1	812	826	2.49e-05	PB1
1	839	866	2.49e-05	PB1
1	996	1007	2.49e-05	PB1
1	1820	1834	2.49e-05	PB1
1	1822	1838	2.49e-05	PB1
1	1908	1921	2.49e-05	PB1
1	2162	2175	2.49e-05	PB1
1	87	1980	4.54e-05	PB2
1	87	1694	4.54e-05	PB2
1	135	2044	4.54e-05	PB2
1	79	2079	4.54e-05	PB2
1	81	2062	4.54e-05	PB2
1	107	2057	4.54e-05	PB2
1	120	1906	4.54e-05	PB2
1	84	2122	4.54e-05	PB2
6	136	2125	0.000272444	PB2
1	109	2043	4.54e-05	PB2
1	151	2142	4.54e-05	PB2
1	88	1633	4.54e-05	PB2
1	178	2099	4.54e-05	PB2
1	219	1826	4.54e-05	PB2
1	136	1962	4.54e-05	PB2
1	158	2008	4.54e-05	PB2
1	150	1944	4.54e-05	PB2
1	180	2181	4.54e-05	PB2
1	172	1764	4.54e-05	PB2
1	215	1735	4.54e-05	PB2
1	231	1958	4.54e-05	PB2
1	160	1757	4.54e-05	PB2
1	167	1595	4.54e-05	PB2
1	185	1789	4.54e-05	PB2
2	186	1590	9.08e-05	PB2
1	234	2075	4.54e-05	PB2
1	209	777	4.54e-05	PB2
1	274	1891	4.54e-05	PB2
1	205	1935	4.54e-05	PB2
1	300	2113	4.54e-05	PB2
1	236	2003	4.54e-05	PB2
1	261	1990	4.54e-05	PB2
1	335	2102	4.54e-05	PB2
1	284	2057	4.54e-05	PB2
2	341	2011	9.08e-05	PB2
1	331	2138	4.54e-05	PB2
1	423	2189	4.54e-05	PB2
1	374	2206	4.54e-05	PB2
1	424	2054	4.54e-05	PB2
1	396	1958	4.54e-05	PB2
1	383	1862	4.54e-05	PB2
1	462	2233	4.54e-05	PB2
1	426	2078	4.54e-05	PB2
1	431	2195	4.54e-05	PB2
2	463	2063	9.08e-05	PB2
1	483	2219	4.54e-05	PB2
2	526	2051	9.08e-05	PB2
1	521	2082	4.54e-05	PB2
1	494	1980	4.54e-05	PB2
2	595	2276	9.08e-05	PB2
1	556	2050	4.54e-05	PB2
1	608	2119	4.54e-05	PB2
1	604	1492	4.54e-05	PB2
2	575	2211	9.08e-05	PB2
1	578	2045	4.54e-05	PB2
2	673	2105	9.08e-05	PB2
1	628	783	4.54e-05	PB2
1	689	2096	4.54e-05	PB2
1	742	2170	4.54e-05	PB2
1	792	1031	4.54e-05	PB2
1	842	1070	4.54e-05	PB2
1	791	1184	4.54e-05	PB2
1	848	1505	4.54e-05	PB2
1	872	1840	4.54e-05	PB2
1	977	1044	4.54e-05	PB2
1	1044	1090	4.54e-05	PB2
1	1035	1173	4.54e-05	PB2
2	1043	1452	9.08e-05	PB2
1	1096	1834	4.54e-05	PB2
1	1151	1260	4.54e-05	PB2
1	1270	1947	4.54e-05	PB2
1	1244	1453	4.54e-05	PB2
1	1366	1747	4.54e-05	PB2
1	1380	1725	4.54e-05	PB2
1	1395	1459	4.54e-05	PB2
1	1458	1813	4.54e-05	PB2
2	1450	1532	9.08e-05	PB2
1	1458	1945	4.54e-05	PB2
1	1481	1981	4.54e-05	PB2
1	1489	2106	4.54e-05	PB2
1	1450	2099	4.54e-05	PB2
1	1520	2231	4.54e-05	PB2
1	1547	1609	4.54e-05	PB2
1	1549	1635	4.54e-05	PB2
1	1840	1943	4.54e-05	PB2
1	1898	2108	4.54e-05	PB2
1	1976	2044	4.54e-05	PB2
1	2015	2126	4.54e-05	PB2
2	2061	2143	9.08e-05	PB2
1	136	147	4.54e-05	PB2
1	234	245	4.54e-05	PB2
1	704	715	4.54e-05	PB2
1	735	747	4.54e-05	PB2
1	820	837	4.54e-05	PB2
1	970	1038	4.54e-05	PB2
2	1130	1154	9.08e-05	PB2
1	1131	1192	4.54e-05	PB2
5	1130	1158	0.000227036	PB2
1	1342	1360	4.54e-05	PB2
1	1646	1664	4.54e-05	PB2
1	1933	1946	4.54e-05	PB2
1	2031	2080	4.54e-05	PB2
1	2046	2083	4.54e-05	PB2

## Sheet: IVT-vRNAs RT–PCR–seq
Count	Breakpoint start	Breakpoint end	Frequency	Segment
1	552	785	0.000250605	HA
1	576	953	0.000250605	HA
1	540	1093	0.000250605	HA
1	1039	1134	0.000250605	HA
1	529	560	0.000250605	HA
1	49	671	2.34596e-05	M
2	63	867	4.69192e-05	M
2	125	928	4.69192e-05	M
1	238	678	2.34596e-05	M
1	257	371	2.34596e-05	M
1	282	897	2.34596e-05	M
1	350	923	2.34596e-05	M
1	347	906	2.34596e-05	M
1	353	870	2.34596e-05	M
1	427	755	2.34596e-05	M
1	432	601	2.34596e-05	M
1	443	778	2.34596e-05	M
5	478	553	0.000117298	M
1	469	595	2.34596e-05	M
3	511	653	7.03787e-05	M
1	484	734	2.34596e-05	M
1	484	638	2.34596e-05	M
1	555	624	2.34596e-05	M
2	619	664	4.69192e-05	M
1	649	917	2.34596e-05	M
1	760	915	2.34596e-05	M
1	761	797	2.34596e-05	M
1	330	341	2.34596e-05	M
1	524	571	2.34596e-05	M
1	577	591	2.34596e-05	M
1	622	664	2.34596e-05	M
1	201	357	8.91484e-05	NA
1	271	997	8.91484e-05	NA
1	336	679	8.91484e-05	NA
1	406	1253	8.91484e-05	NA
1	375	485	8.91484e-05	NA
1	399	518	8.91484e-05	NA
1	393	940	8.91484e-05	NA
1	470	726	8.91484e-05	NA
1	555	1235	8.91484e-05	NA
1	567	991	8.91484e-05	NA
1	673	1316	8.91484e-05	NA
1	626	1267	8.91484e-05	NA
3	715	1211	0.000267445	NA
1	1093	1288	8.91484e-05	NA
1	319	343	8.91484e-05	NA
1	535	580	8.91484e-05	NA
1	570	594	8.91484e-05	NA
1	1039	1081	8.91484e-05	NA
1	116	990	0.000204011	NP
2	81	1156	0.000408023	NP
1	38	1371	0.000204011	NP
1	143	614	0.000204011	NP
1	218	1227	0.000204011	NP
1	168	951	0.000204011	NP
1	197	1458	0.000204011	NP
2	201	1088	0.000408023	NP
1	267	1477	0.000204011	NP
1	299	1424	0.000204011	NP
2	265	1456	0.000408023	NP
2	297	1425	0.000408023	NP
1	289	524	0.000204011	NP
7	345	1386	0.00142808	NP
1	345	1430	0.000204011	NP
1	378	495	0.000204011	NP
2	399	457	0.000408023	NP
5	426	478	0.00102006	NP
1	417	609	0.000204011	NP
1	499	1438	0.000204011	NP
1	604	752	0.000204011	NP
2	693	1138	0.000408023	NP
1	632	763	0.000204011	NP
1	774	843	0.000204011	NP
2	769	842	0.000408023	NP
1	956	1308	0.000204011	NP
1	904	1032	0.000204011	NP
1	924	1223	0.000204011	NP
1	1262	1325	0.000204011	NP
1	1198	1333	0.000204011	NP
3	703	724	0.000612034	NP
1	162	249	0.000593472	NS
1	265	341	0.000593472	NS
60	58	1961	0.0236111	PB1
1	101	2143	0.000393518	PB1
1	44	1754	0.000393518	PB1
1	94	1983	0.000393518	PB1
1	86	2053	0.000393518	PB1
1	47	1768	0.000393518	PB1
1	46	1917	0.000393518	PB1
1	124	1976	0.000393518	PB1
1	97	2019	0.000393518	PB1
1	100	2068	0.000393518	PB1
1	88	1931	0.000393518	PB1
1	123	1483	0.000393518	PB1
1	86	1776	0.000393518	PB1
1	96	205	0.000393518	PB1
8	181	2074	0.00314815	PB1
1	153	1974	0.000393518	PB1
1	133	1964	0.000393518	PB1
1	201	1755	0.000393518	PB1
1	163	1938	0.000393518	PB1
1	151	2073	0.000393518	PB1
1	209	1688	0.000393518	PB1
2	228	2194	0.000787036	PB1
1	251	849	0.000393518	PB1
1	255	2063	0.000393518	PB1
1	205	2219	0.000393518	PB1
1	247	1949	0.000393518	PB1
1	244	2139	0.000393518	PB1
1	292	2061	0.000393518	PB1
1	316	1911	0.000393518	PB1
2	358	2264	0.000787036	PB1
1	319	1874	0.000393518	PB1
1	306	2177	0.000393518	PB1
1	309	1659	0.000393518	PB1
1	375	2197	0.000393518	PB1
2	357	2236	0.000787036	PB1
1	336	2203	0.000393518	PB1
1	360	2264	0.000393518	PB1
1	367	2206	0.000393518	PB1
1	456	2277	0.000393518	PB1
1	440	2004	0.000393518	PB1
5	437	2098	0.00196759	PB1
1	449	2193	0.000393518	PB1
2	472	2282	0.000787036	PB1
1	469	1673	0.000393518	PB1
83	498	2215	0.032662	PB1
1	454	1552	0.000393518	PB1
1	486	2186	0.000393518	PB1
1	499	2216	0.000393518	PB1
1	503	2220	0.000393518	PB1
2	543	2078	0.000787036	PB1
2	565	2243	0.000787036	PB1
1	551	2260	0.000393518	PB1
1	580	2235	0.000393518	PB1
1	523	2166	0.000393518	PB1
1	544	1943	0.000393518	PB1
1	555	1857	0.000393518	PB1
1	658	2079	0.000393518	PB1
1	802	1989	0.000393518	PB1
1	842	2168	0.000393518	PB1
1	1153	1743	0.000393518	PB1
1	72	1574	0.00061101	PB2
1	50	1947	0.00061101	PB2
1	50	2010	0.00061101	PB2
1	47	1878	0.00061101	PB2
1	103	1902	0.00061101	PB2
15	136	2125	0.00916515	PB2
1	61	2091	0.00061101	PB2
1	137	2126	0.00061101	PB2
1	148	2066	0.00061101	PB2
1	101	2015	0.00061101	PB2
1	83	2030	0.00061101	PB2
1	139	2119	0.00061101	PB2
1	104	1973	0.00061101	PB2
1	157	2090	0.00061101	PB2
1	143	1500	0.00061101	PB2
1	173	1883	0.00061101	PB2
1	193	1982	0.00061101	PB2
1	126	1871	0.00061101	PB2
1	164	2065	0.00061101	PB2
1	212	2085	0.00061101	PB2
1	143	1977	0.00061101	PB2
1	214	1812	0.00061101	PB2
1	169	1723	0.00061101	PB2
1	198	1703	0.00061101	PB2
1	220	1832	0.00061101	PB2
1	265	2157	0.00061101	PB2
1	192	1787	0.00061101	PB2
1	261	2098	0.00061101	PB2
2	232	1599	0.00122202	PB2
1	218	2244	0.00061101	PB2
1	283	2273	0.00061101	PB2
1	273	2291	0.00061101	PB2
1	226	1771	0.00061101	PB2
1	279	2146	0.00061101	PB2
1	298	2225	0.00061101	PB2
1	260	2157	0.00061101	PB2
1	254	2198	0.00061101	PB2
1	297	1957	0.00061101	PB2
1	225	2223	0.00061101	PB2
1	293	2291	0.00061101	PB2
1	268	2219	0.00061101	PB2
2	292	2269	0.00122202	PB2
1	273	2254	0.00061101	PB2
1	257	1918	0.00061101	PB2
1	305	2287	0.00061101	PB2
1	252	2229	0.00061101	PB2
2	331	2138	0.00122202	PB2
1	336	2298	0.00061101	PB2
1	320	2009	0.00061101	PB2
1	262	2221	0.00061101	PB2
1	307	2252	0.00061101	PB2
1	320	2211	0.00061101	PB2
1	281	2230	0.00061101	PB2
1	295	1898	0.00061101	PB2
1	339	1790	0.00061101	PB2
1	377	2227	0.00061101	PB2
2	308	1978	0.00122202	PB2
1	392	2298	0.00061101	PB2
1	396	2299	0.00061101	PB2
1	349	2207	0.00061101	PB2
1	383	2061	0.00061101	PB2
1	416	2032	0.00061101	PB2
1	375	2229	0.00061101	PB2
1	355	1898	0.00061101	PB2
1	433	2270	0.00061101	PB2
1	401	2239	0.00061101	PB2
1	442	2077	0.00061101	PB2
1	453	2186	0.00061101	PB2
1	389	2207	0.00061101	PB2
1	425	2144	0.00061101	PB2
1	438	2241	0.00061101	PB2
2	487	2310	0.00122202	PB2
1	482	2188	0.00061101	PB2
1	475	2282	0.00061101	PB2
1	433	2056	0.00061101	PB2
1	495	2220	0.00061101	PB2
2	493	2195	0.00122202	PB2
1	454	1352	0.00061101	PB2
2	496	2184	0.00122202	PB2
1	498	2259	0.00061101	PB2
1	477	2154	0.00061101	PB2
1	470	1994	0.00061101	PB2
1	541	2100	0.00061101	PB2
1	531	2255	0.00061101	PB2
1	650	1815	0.00061101	PB2
1	580	2144	0.00061101	PB2
1	626	2225	0.00061101	PB2
1	711	2106	0.00061101	PB2
1	768	2226	0.00061101	PB2
1	836	2196	0.00061101	PB2
1	892	1001	0.00061101	PB2
1	970	1696	0.00061101	PB2
1	976	1460	0.00061101	PB2
1	984	2211	0.00061101	PB2
1	1118	1645	0.00061101	PB2
1	1272	1512	0.00061101	PB2
1	1287	1446	0.00061101	PB2
1	1677	1803	0.00061101	PB2
1	1811	1944	0.00061101	PB2
1	144	1550	0.000115021	HA
1	267	1583	0.000115021	HA
1	276	1679	0.000115021	HA
1	328	1685	0.000115021	HA
1	312	1680	0.000115021	HA
1	387	1670	0.000115021	HA
1	333	1417	0.000115021	HA
1	352	1535	0.000115021	HA
1	484	1689	0.000115021	HA
1	573	1402	0.000115021	HA
1	702	789	0.000115021	HA
1	900	1512	0.000115021	HA
1	1002	1102	0.000115021	HA
1	1002	1673	0.000115021	HA
1	529	560	0.000115021	HA
2	739	776	0.000230043	HA
3	119	796	4.33883e-05	M
4	118	733	5.78511e-05	M
17	123	930	0.000245867	M
1	77	791	1.44628e-05	M
1	59	703	1.44628e-05	M
1	131	835	1.44628e-05	M
2	72	645	2.89256e-05	M
1	105	730	1.44628e-05	M
1	66	764	1.44628e-05	M
1	115	844	1.44628e-05	M
1	70	534	1.44628e-05	M
1	47	798	1.44628e-05	M
2	63	867	2.89256e-05	M
1	51	754	1.44628e-05	M
2	71	579	2.89256e-05	M
1	147	858	1.44628e-05	M
1	147	694	1.44628e-05	M
1	147	876	1.44628e-05	M
2	106	725	2.89256e-05	M
1	123	816	1.44628e-05	M
1	152	812	1.44628e-05	M
1	183	932	1.44628e-05	M
1	213	936	1.44628e-05	M
1	135	857	1.44628e-05	M
1	161	882	1.44628e-05	M
1	158	824	1.44628e-05	M
1	157	888	1.44628e-05	M
2	224	855	2.89256e-05	M
1	171	880	1.44628e-05	M
1	226	933	1.44628e-05	M
1	146	825	1.44628e-05	M
2	221	922	2.89256e-05	M
1	241	938	1.44628e-05	M
1	217	808	1.44628e-05	M
1	242	919	1.44628e-05	M
1	226	741	1.44628e-05	M
1	265	773	1.44628e-05	M
1	178	646	1.44628e-05	M
1	221	382	1.44628e-05	M
1	249	917	1.44628e-05	M
1	273	923	1.44628e-05	M
1	243	892	1.44628e-05	M
1	287	792	1.44628e-05	M
1	295	822	1.44628e-05	M
1	294	921	1.44628e-05	M
1	243	849	1.44628e-05	M
1	256	873	1.44628e-05	M
1	308	924	1.44628e-05	M
1	341	938	1.44628e-05	M
1	310	452	1.44628e-05	M
1	303	897	1.44628e-05	M
1	310	874	1.44628e-05	M
1	355	955	1.44628e-05	M
1	304	847	1.44628e-05	M
1	344	899	1.44628e-05	M
1	314	866	1.44628e-05	M
2	353	428	2.89256e-05	M
1	326	885	1.44628e-05	M
1	410	931	1.44628e-05	M
1	385	936	1.44628e-05	M
1	369	572	1.44628e-05	M
1	387	660	1.44628e-05	M
5	427	755	7.23139e-05	M
1	390	820	1.44628e-05	M
1	429	757	1.44628e-05	M
2	432	601	2.89256e-05	M
4	478	553	5.78511e-05	M
3	511	653	4.33883e-05	M
1	513	595	1.44628e-05	M
2	476	612	2.89256e-05	M
1	565	642	1.44628e-05	M
1	587	925	1.44628e-05	M
2	565	693	2.89256e-05	M
1	538	863	1.44628e-05	M
1	596	830	1.44628e-05	M
1	622	664	1.44628e-05	M
7	646	737	0.000101239	M
2	619	736	2.89256e-05	M
1	649	917	1.44628e-05	M
1	647	738	1.44628e-05	M
2	662	735	2.89256e-05	M
1	660	760	1.44628e-05	M
1	722	838	1.44628e-05	M
1	758	931	1.44628e-05	M
1	760	915	1.44628e-05	M
5	761	797	7.23139e-05	M
1	198	212	1.44628e-05	M
1	340	352	1.44628e-05	M
1	438	453	1.44628e-05	M
1	560	604	1.44628e-05	M
1	542	565	1.44628e-05	M
1	589	632	1.44628e-05	M
1	247	979	0.000221114	NA
1	314	834	0.000221114	NA
1	357	1319	0.000221114	NA
1	394	1140	0.000221114	NA
1	882	951	0.000221114	NA
1	913	1044	0.000221114	NA
1	1116	1159	0.000221114	NA
1	1044	1121	0.000221114	NA
1	803	823	0.000221114	NA
1	112	1346	0.000118129	NP
1	101	1402	0.000118129	NP
1	79	1115	0.000118129	NP
10	81	1156	0.00118129	NP
1	43	1250	0.000118129	NP
4	38	1371	0.000472518	NP
1	91	1321	0.000118129	NP
1	126	1472	0.000118129	NP
3	88	1384	0.000354388	NP
1	74	1249	0.000118129	NP
1	123	1245	0.000118129	NP
2	50	1440	0.000236259	NP
1	131	1349	0.000118129	NP
1	82	1068	0.000118129	NP
1	51	1164	0.000118129	NP
1	87	1132	0.000118129	NP
2	143	1385	0.000236259	NP
1	93	1349	0.000118129	NP
1	59	1027	0.000118129	NP
1	117	1084	0.000118129	NP
2	114	1372	0.000236259	NP
1	140	1116	0.000118129	NP
1	177	1369	0.000118129	NP
1	179	1186	0.000118129	NP
1	144	1450	0.000118129	NP
1	135	1093	0.000118129	NP
1	153	1429	0.000118129	NP
3	219	970	0.000354388	NP
1	199	1363	0.000118129	NP
1	143	1376	0.000118129	NP
1	162	1331	0.000118129	NP
1	212	1466	0.000118129	NP
1	235	1393	0.000118129	NP
1	153	1382	0.000118129	NP
2	154	1463	0.000236259	NP
1	231	1486	0.000118129	NP
1	203	1457	0.000118129	NP
1	201	1490	0.000118129	NP
1	201	1088	0.000118129	NP
1	225	1221	0.000118129	NP
1	214	1496	0.000118129	NP
3	253	1301	0.000354388	NP
1	201	1295	0.000118129	NP
1	252	1529	0.000118129	NP
1	179	1424	0.000118129	NP
1	246	1434	0.000118129	NP
2	243	1471	0.000236259	NP
1	258	1490	0.000118129	NP
1	207	1470	0.000118129	NP
1	222	1408	0.000118129	NP
1	246	1502	0.000118129	NP
5	255	1480	0.000590647	NP
1	194	1418	0.000118129	NP
1	248	1460	0.000118129	NP
1	236	1444	0.000118129	NP
1	207	876	0.000118129	NP
1	284	1500	0.000118129	NP
1	207	1445	0.000118129	NP
3	297	1425	0.000354388	NP
1	299	1516	0.000118129	NP
1	265	1448	0.000118129	NP
1	267	1459	0.000118129	NP
1	239	418	0.000118129	NP
1	265	1142	0.000118129	NP
2	292	1419	0.000236259	NP
1	293	1464	0.000118129	NP
1	293	1452	0.000118129	NP
19	345	1386	0.00224446	NP
1	358	1162	0.000118129	NP
1	348	1245	0.000118129	NP
2	351	1218	0.000236259	NP
1	341	1478	0.000118129	NP
1	319	663	0.000118129	NP
1	427	1520	0.000118129	NP
3	426	478	0.000354388	NP
1	417	609	0.000118129	NP
1	383	1404	0.000118129	NP
1	399	457	0.000118129	NP
1	457	571	0.000118129	NP
1	426	543	0.000118129	NP
1	394	1447	0.000118129	NP
1	479	1395	0.000118129	NP
1	503	1501	0.000118129	NP
1	500	1029	0.000118129	NP
1	476	542	0.000118129	NP
1	494	1306	0.000118129	NP
1	517	675	0.000118129	NP
1	519	887	0.000118129	NP
3	769	842	0.000354388	NP
2	760	888	0.000236259	NP
1	733	1133	0.000118129	NP
1	759	1032	0.000118129	NP
1	774	843	0.000118129	NP
1	923	1108	0.000118129	NP
1	961	1140	0.000118129	NP
1	990	1074	0.000118129	NP
1	1096	1218	0.000118129	NP
2	1017	1068	0.000236259	NP
1	1125	1524	0.000118129	NP
1	1177	1299	0.000118129	NP
2	1262	1325	0.000236259	NP
6	703	724	0.000708777	NP
1	1269	1313	0.000118129	NP
1	1294	1356	0.000118129	NP
1	59	735	0.000103182	NS
1	128	444	0.000103182	NS
1	95	360	0.000103182	NS
1	103	620	0.000103182	NS
1	97	213	0.000103182	NS
1	142	708	0.000103182	NS
1	243	535	0.000103182	NS
2	317	544	0.000206365	NS
1	310	539	0.000103182	NS
2	355	429	0.000206365	NS
2	409	531	0.000206365	NS
1	447	633	0.000103182	NS
1	509	663	0.000103182	NS
1	317	342	0.000103182	NS
1	101	1895	0.000121707	PA
4	95	1887	0.000486829	PA
1	99	1719	0.000121707	PA
1	237	1619	0.000121707	PA
1	212	1936	0.000121707	PA
1	261	1501	0.000121707	PA
1	283	2049	0.000121707	PA
1	477	1755	0.000121707	PA
1	515	627	0.000121707	PA
1	605	1800	0.000121707	PA
1	611	1507	0.000121707	PA
1	726	1504	0.000121707	PA
2	897	2092	0.000243414	PA
1	1056	1932	0.000121707	PA
1	1192	2085	0.000121707	PA
1	1249	1345	0.000121707	PA
1	1939	2150	0.000121707	PA
169	58	1961	0.0331639	PB1
1	42	2054	0.000196236	PB1
2	97	2019	0.000392472	PB1
1	55	2124	0.000196236	PB1
1	110	2165	0.000196236	PB1
1	115	2174	0.000196236	PB1
3	53	2093	0.000588708	PB1
1	69	1931	0.000196236	PB1
8	101	2143	0.00156989	PB1
1	60	1968	0.000196236	PB1
1	86	1755	0.000196236	PB1
1	47	2095	0.000196236	PB1
1	89	1957	0.000196236	PB1
1	61	2134	0.000196236	PB1
1	41	1944	0.000196236	PB1
1	94	1992	0.000196236	PB1
1	92	1974	0.000196236	PB1
1	88	2130	0.000196236	PB1
1	61	1964	0.000196236	PB1
1	114	2068	0.000196236	PB1
1	134	2062	0.000196236	PB1
1	124	2271	0.000196236	PB1
1	51	1928	0.000196236	PB1
1	86	2037	0.000196236	PB1
1	118	2143	0.000196236	PB1
1	60	2020	0.000196236	PB1
1	104	2026	0.000196236	PB1
1	77	1997	0.000196236	PB1
1	99	1804	0.000196236	PB1
1	133	2194	0.000196236	PB1
1	87	2170	0.000196236	PB1
1	60	2126	0.000196236	PB1
1	56	1959	0.000196236	PB1
1	104	2157	0.000196236	PB1
1	123	2219	0.000196236	PB1
1	95	2185	0.000196236	PB1
1	101	1755	0.000196236	PB1
1	52	2055	0.000196236	PB1
1	52	2092	0.000196236	PB1
1	114	1926	0.000196236	PB1
1	72	2215	0.000196236	PB1
1	61	2130	0.000196236	PB1
1	69	1601	0.000196236	PB1
1	122	2176	0.000196236	PB1
2	145	2068	0.000392472	PB1
1	153	2186	0.000196236	PB1
1	139	2214	0.000196236	PB1
1	101	1902	0.000196236	PB1
1	154	2181	0.000196236	PB1
1	111	2052	0.000196236	PB1
1	97	2164	0.000196236	PB1
1	84	1225	0.000196236	PB1
1	107	1958	0.000196236	PB1
1	138	2178	0.000196236	PB1
1	116	2097	0.000196236	PB1
81	181	2074	0.0158951	PB1
1	155	2157	0.000196236	PB1
1	141	2231	0.000196236	PB1
1	174	1079	0.000196236	PB1
1	158	2204	0.000196236	PB1
1	117	1969	0.000196236	PB1
1	187	2279	0.000196236	PB1
2	141	2233	0.000392472	PB1
10	173	2231	0.00196236	PB1
1	130	2127	0.000196236	PB1
1	173	2217	0.000196236	PB1
1	196	2184	0.000196236	PB1
1	139	1927	0.000196236	PB1
1	177	2154	0.000196236	PB1
1	184	2212	0.000196236	PB1
12	200	2214	0.00235483	PB1
1	175	2243	0.000196236	PB1
1	132	2163	0.000196236	PB1
1	149	1626	0.000196236	PB1
1	159	2011	0.000196236	PB1
1	129	2198	0.000196236	PB1
1	174	1857	0.000196236	PB1
1	190	2192	0.000196236	PB1
1	139	2233	0.000196236	PB1
1	164	2167	0.000196236	PB1
1	180	2231	0.000196236	PB1
1	161	2250	0.000196236	PB1
1	217	2226	0.000196236	PB1
1	189	2008	0.000196236	PB1
1	175	1983	0.000196236	PB1
2	214	2058	0.000392472	PB1
16	205	2219	0.00313978	PB1
57	228	2194	0.0111855	PB1
1	146	1605	0.000196236	PB1
1	211	2115	0.000196236	PB1
1	222	2056	0.000196236	PB1
1	156	2174	0.000196236	PB1
1	173	2150	0.000196236	PB1
1	203	2178	0.000196236	PB1
1	148	2153	0.000196236	PB1
1	212	2276	0.000196236	PB1
5	247	1928	0.000981181	PB1
1	191	1945	0.000196236	PB1
1	180	2011	0.000196236	PB1
1	165	2083	0.000196236	PB1
1	192	1728	0.000196236	PB1
1	244	2270	0.000196236	PB1
1	205	2174	0.000196236	PB1
1	189	2082	0.000196236	PB1
1	216	2253	0.000196236	PB1
17	244	2139	0.00333601	PB1
1	252	1919	0.000196236	PB1
1	208	1725	0.000196236	PB1
1	176	2026	0.000196236	PB1
1	184	2239	0.000196236	PB1
1	178	2191	0.000196236	PB1
1	256	2135	0.000196236	PB1
1	216	2184	0.000196236	PB1
1	170	2127	0.000196236	PB1
1	204	1905	0.000196236	PB1
1	207	2154	0.000196236	PB1
1	198	2090	0.000196236	PB1
1	201	2141	0.000196236	PB1
3	257	2090	0.000588708	PB1
1	222	1731	0.000196236	PB1
1	251	2059	0.000196236	PB1
1	240	2184	0.000196236	PB1
1	247	2217	0.000196236	PB1
1	215	2102	0.000196236	PB1
1	267	1950	0.000196236	PB1
1	203	2075	0.000196236	PB1
1	218	2019	0.000196236	PB1
1	229	1904	0.000196236	PB1
1	257	2190	0.000196236	PB1
1	234	2255	0.000196236	PB1
1	234	2022	0.000196236	PB1
1	205	2019	0.000196236	PB1
1	215	2194	0.000196236	PB1
1	215	2165	0.000196236	PB1
1	292	2248	0.000196236	PB1
1	242	2089	0.000196236	PB1
1	226	2170	0.000196236	PB1
1	267	2186	0.000196236	PB1
1	300	2102	0.000196236	PB1
1	270	1824	0.000196236	PB1
1	236	2197	0.000196236	PB1
1	289	2220	0.000196236	PB1
1	251	2136	0.000196236	PB1
1	297	2256	0.000196236	PB1
1	321	2280	0.000196236	PB1
1	239	2195	0.000196236	PB1
1	292	2229	0.000196236	PB1
1	318	2297	0.000196236	PB1
1	334	2244	0.000196236	PB1
2	317	1289	0.000392472	PB1
1	296	2232	0.000196236	PB1
1	325	2229	0.000196236	PB1
1	308	2252	0.000196236	PB1
1	322	2242	0.000196236	PB1
1	359	2209	0.000196236	PB1
1	295	2147	0.000196236	PB1
1	326	2169	0.000196236	PB1
1	345	2071	0.000196236	PB1
2	358	2182	0.000392472	PB1
1	354	2176	0.000196236	PB1
2	363	2206	0.000392472	PB1
3	344	2045	0.000588708	PB1
1	290	2153	0.000196236	PB1
1	357	2119	0.000196236	PB1
1	323	2159	0.000196236	PB1
1	359	2266	0.000196236	PB1
1	317	2075	0.000196236	PB1
1	372	2201	0.000196236	PB1
1	325	2076	0.000196236	PB1
1	378	2221	0.000196236	PB1
1	361	2111	0.000196236	PB1
1	325	2188	0.000196236	PB1
1	319	2149	0.000196236	PB1
1	332	2234	0.000196236	PB1
1	335	2053	0.000196236	PB1
1	388	2297	0.000196236	PB1
2	374	2116	0.000392472	PB1
1	359	2100	0.000196236	PB1
1	393	2264	0.000196236	PB1
1	352	2151	0.000196236	PB1
1	334	2208	0.000196236	PB1
1	361	2102	0.000196236	PB1
1	405	2127	0.000196236	PB1
1	374	1619	0.000196236	PB1
1	374	591	0.000196236	PB1
1	379	2220	0.000196236	PB1
2	402	2209	0.000392472	PB1
1	433	2306	0.000196236	PB1
1	362	2097	0.000196236	PB1
9	437	2098	0.00176612	PB1
1	384	2118	0.000196236	PB1
1	401	2229	0.000196236	PB1
1	438	2144	0.000196236	PB1
1	387	2151	0.000196236	PB1
1	369	2196	0.000196236	PB1
1	374	2201	0.000196236	PB1
1	413	2019	0.000196236	PB1
1	453	1958	0.000196236	PB1
2	472	2282	0.000392472	PB1
1	449	2157	0.000196236	PB1
224	498	2215	0.0439569	PB1
1	462	2243	0.000196236	PB1
1	433	2207	0.000196236	PB1
1	483	2288	0.000196236	PB1
1	475	2226	0.000196236	PB1
1	447	2229	0.000196236	PB1
1	478	2083	0.000196236	PB1
1	447	1959	0.000196236	PB1
1	524	2271	0.000196236	PB1
1	452	2192	0.000196236	PB1
1	494	2194	0.000196236	PB1
2	549	2229	0.000392472	PB1
1	480	2166	0.000196236	PB1
11	565	2243	0.0021586	PB1
1	500	2217	0.000196236	PB1
1	501	2218	0.000196236	PB1
1	523	1644	0.000196236	PB1
1	499	2216	0.000196236	PB1
1	586	2249	0.000196236	PB1
1	512	2153	0.000196236	PB1
1	521	2190	0.000196236	PB1
1	556	2094	0.000196236	PB1
2	543	2078	0.000392472	PB1
2	620	1714	0.000392472	PB1
1	557	1869	0.000196236	PB1
1	560	2180	0.000196236	PB1
1	566	2126	0.000196236	PB1
1	644	2271	0.000196236	PB1
1	618	1970	0.000196236	PB1
1	582	2231	0.000196236	PB1
1	666	2237	0.000196236	PB1
2	713	2098	0.000392472	PB1
1	651	2151	0.000196236	PB1
1	741	2269	0.000196236	PB1
1	842	2168	0.000196236	PB1
1	887	1357	0.000196236	PB1
1	1009	2187	0.000196236	PB1
1	1217	1336	0.000196236	PB1
1	1202	2162	0.000196236	PB1
1	1374	1517	0.000196236	PB1
1	93	2042	0.000337369	PB2
1	42	1891	0.000337369	PB2
1	104	2184	0.000337369	PB2
1	78	2137	0.000337369	PB2
1	37	2079	0.000337369	PB2
1	68	2069	0.000337369	PB2
1	107	1902	0.000337369	PB2
1	84	1986	0.000337369	PB2
1	103	1515	0.000337369	PB2
1	101	2135	0.000337369	PB2
2	116	2185	0.000674738	PB2
1	83	2168	0.000337369	PB2
1	86	2182	0.000337369	PB2
1	117	2232	0.000337369	PB2
1	97	2200	0.000337369	PB2
1	91	2098	0.000337369	PB2
1	102	1972	0.000337369	PB2
1	74	2016	0.000337369	PB2
2	36	2148	0.000674738	PB2
1	114	2136	0.000337369	PB2
1	93	2082	0.000337369	PB2
1	48	2101	0.000337369	PB2
2	92	2119	0.000674738	PB2
1	37	2219	0.000337369	PB2
1	87	2028	0.000337369	PB2
1	64	2158	0.000337369	PB2
1	85	2119	0.000337369	PB2
2	89	2251	0.000674738	PB2
1	113	2226	0.000337369	PB2
1	74	2056	0.000337369	PB2
1	124	1941	0.000337369	PB2
1	55	2157	0.000337369	PB2
1	52	1640	0.000337369	PB2
1	85	1944	0.000337369	PB2
1	77	2083	0.000337369	PB2
1	73	2105	0.000337369	PB2
1	82	1895	0.000337369	PB2
2	95	2233	0.000674738	PB2
1	106	1907	0.000337369	PB2
1	77	2135	0.000337369	PB2
1	118	2198	0.000337369	PB2
1	121	2119	0.000337369	PB2
1	81	2135	0.000337369	PB2
1	70	2072	0.000337369	PB2
1	73	1861	0.000337369	PB2
1	89	1729	0.000337369	PB2
1	69	2061	0.000337369	PB2
1	97	2229	0.000337369	PB2
2	105	2192	0.000674738	PB2
1	135	1790	0.000337369	PB2
1	89	2152	0.000337369	PB2
2	53	2201	0.000674738	PB2
1	79	2144	0.000337369	PB2
1	95	1892	0.000337369	PB2
2	105	2135	0.000674738	PB2
1	128	2298	0.000337369	PB2
2	125	2259	0.000674738	PB2
1	58	2079	0.000337369	PB2
1	115	1974	0.000337369	PB2
1	123	2047	0.000337369	PB2
2	67	2280	0.000674738	PB2
2	134	2071	0.000674738	PB2
334	136	2125	0.112681	PB2
1	121	2131	0.000337369	PB2
1	123	2234	0.000337369	PB2
1	66	2067	0.000337369	PB2
1	106	2138	0.000337369	PB2
1	127	2074	0.000337369	PB2
1	99	2033	0.000337369	PB2
1	91	2014	0.000337369	PB2
1	100	1981	0.000337369	PB2
1	102	2170	0.000337369	PB2
1	61	2039	0.000337369	PB2
1	88	1909	0.000337369	PB2
1	66	2211	0.000337369	PB2
1	123	2002	0.000337369	PB2
1	93	2060	0.000337369	PB2
1	114	1963	0.000337369	PB2
1	114	1992	0.000337369	PB2
1	70	2186	0.000337369	PB2
1	132	2081	0.000337369	PB2
1	142	2112	0.000337369	PB2
1	128	2154	0.000337369	PB2
1	64	2100	0.000337369	PB2
1	111	1993	0.000337369	PB2
2	100	2139	0.000674738	PB2
1	146	2183	0.000337369	PB2
1	96	1952	0.000337369	PB2
1	96	2171	0.000337369	PB2
1	88	2201	0.000337369	PB2
3	135	2254	0.00101211	PB2
1	86	2105	0.000337369	PB2
1	85	2120	0.000337369	PB2
1	73	2199	0.000337369	PB2
1	138	2170	0.000337369	PB2
1	119	1873	0.000337369	PB2
1	78	1890	0.000337369	PB2
1	83	2119	0.000337369	PB2
1	144	2160	0.000337369	PB2
1	126	2190	0.000337369	PB2
1	64	2017	0.000337369	PB2
1	127	1576	0.000337369	PB2
1	83	2186	0.000337369	PB2
1	142	2081	0.000337369	PB2
1	150	1919	0.000337369	PB2
1	103	2148	0.000337369	PB2
1	144	232	0.000337369	PB2
1	84	2100	0.000337369	PB2
1	72	2083	0.000337369	PB2
2	147	2092	0.000674738	PB2
1	125	2197	0.000337369	PB2
2	141	2022	0.000674738	PB2
1	149	1931	0.000337369	PB2
1	104	1816	0.000337369	PB2
1	86	2102	0.000337369	PB2
1	94	1901	0.000337369	PB2
1	148	2188	0.000337369	PB2
1	87	2093	0.000337369	PB2
1	136	2108	0.000337369	PB2
1	126	2163	0.000337369	PB2
1	88	1920	0.000337369	PB2
1	104	1887	0.000337369	PB2
1	163	2140	0.000337369	PB2
1	157	2164	0.000337369	PB2
1	79	1943	0.000337369	PB2
1	104	2052	0.000337369	PB2
1	171	1848	0.000337369	PB2
1	109	1826	0.000337369	PB2
1	96	2223	0.000337369	PB2
1	153	2004	0.000337369	PB2
1	127	2127	0.000337369	PB2
2	167	2212	0.000674738	PB2
1	97	1890	0.000337369	PB2
1	155	2095	0.000337369	PB2
1	101	2190	0.000337369	PB2
3	153	2143	0.00101211	PB2
1	81	2058	0.000337369	PB2
2	114	2284	0.000674738	PB2
1	132	1836	0.000337369	PB2
1	126	1830	0.000337369	PB2
1	122	2169	0.000337369	PB2
1	157	2148	0.000337369	PB2
1	173	2065	0.000337369	PB2
1	155	2183	0.000337369	PB2
1	95	1987	0.000337369	PB2
1	95	2135	0.000337369	PB2
1	129	2029	0.000337369	PB2
1	122	2087	0.000337369	PB2
1	181	2157	0.000337369	PB2
1	180	2079	0.000337369	PB2
1	139	2128	0.000337369	PB2
1	119	2102	0.000337369	PB2
1	104	1931	0.000337369	PB2
1	176	2139	0.000337369	PB2
1	186	2240	0.000337369	PB2
1	153	1895	0.000337369	PB2
1	122	2227	0.000337369	PB2
1	133	2242	0.000337369	PB2
1	162	2092	0.000337369	PB2
1	176	1838	0.000337369	PB2
1	167	2269	0.000337369	PB2
1	173	2185	0.000337369	PB2
1	115	1786	0.000337369	PB2
1	134	2075	0.000337369	PB2
1	140	2011	0.000337369	PB2
1	112	2032	0.000337369	PB2
1	128	1652	0.000337369	PB2
2	135	2118	0.000674738	PB2
1	153	1995	0.000337369	PB2
1	147	1855	0.000337369	PB2
1	183	1991	0.000337369	PB2
1	120	2200	0.000337369	PB2
1	153	1934	0.000337369	PB2
1	185	2095	0.000337369	PB2
1	147	2175	0.000337369	PB2
1	150	1750	0.000337369	PB2
1	160	1924	0.000337369	PB2
1	138	1892	0.000337369	PB2
1	130	2008	0.000337369	PB2
1	177	2263	0.000337369	PB2
1	149	2165	0.000337369	PB2
4	172	2037	0.00134948	PB2
1	197	2193	0.000337369	PB2
2	179	2119	0.000674738	PB2
1	131	1918	0.000337369	PB2
1	166	2068	0.000337369	PB2
1	212	2277	0.000337369	PB2
1	142	2103	0.000337369	PB2
1	152	2048	0.000337369	PB2
2	181	2020	0.000674738	PB2
1	210	2182	0.000337369	PB2
1	144	2146	0.000337369	PB2
1	146	2105	0.000337369	PB2
2	179	2190	0.000674738	PB2
1	199	2292	0.000337369	PB2
1	139	2138	0.000337369	PB2
3	165	2230	0.00101211	PB2
1	172	2141	0.000337369	PB2
1	138	2005	0.000337369	PB2
1	200	1837	0.000337369	PB2
1	193	2136	0.000337369	PB2
1	137	2068	0.000337369	PB2
1	215	2083	0.000337369	PB2
1	154	2090	0.000337369	PB2
2	187	2229	0.000674738	PB2
1	173	2043	0.000337369	PB2
1	170	1946	0.000337369	PB2
1	147	2041	0.000337369	PB2
1	223	2225	0.000337369	PB2
1	225	2287	0.000337369	PB2
1	159	2076	0.000337369	PB2
1	179	2227	0.000337369	PB2
1	167	1950	0.000337369	PB2
1	202	2144	0.000337369	PB2
1	168	2131	0.000337369	PB2
1	185	2058	0.000337369	PB2
6	182	2229	0.00202421	PB2
1	194	2198	0.000337369	PB2
1	209	1664	0.000337369	PB2
1	235	2281	0.000337369	PB2
1	172	2119	0.000337369	PB2
1	192	2154	0.000337369	PB2
1	205	2265	0.000337369	PB2
1	225	2266	0.000337369	PB2
1	166	2145	0.000337369	PB2
2	171	2219	0.000674738	PB2
1	170	1927	0.000337369	PB2
1	182	1756	0.000337369	PB2
2	167	2104	0.000674738	PB2
1	217	2274	0.000337369	PB2
1	160	2199	0.000337369	PB2
1	239	2253	0.000337369	PB2
1	240	2244	0.000337369	PB2
1	200	2152	0.000337369	PB2
1	229	2098	0.000337369	PB2
2	199	2253	0.000674738	PB2
1	170	2050	0.000337369	PB2
2	239	2165	0.000674738	PB2
1	234	2273	0.000337369	PB2
1	164	2145	0.000337369	PB2
1	170	2221	0.000337369	PB2
2	235	2100	0.000674738	PB2
1	220	2063	0.000337369	PB2
1	233	2145	0.000337369	PB2
1	241	2171	0.000337369	PB2
1	208	2101	0.000337369	PB2
1	169	1965	0.000337369	PB2
1	171	2206	0.000337369	PB2
1	215	2071	0.000337369	PB2
1	239	2121	0.000337369	PB2
1	246	1956	0.000337369	PB2
1	174	2230	0.000337369	PB2
1	241	2247	0.000337369	PB2
1	230	2183	0.000337369	PB2
2	235	2213	0.000674738	PB2
1	167	2094	0.000337369	PB2
1	168	2148	0.000337369	PB2
1	167	2187	0.000337369	PB2
1	194	1816	0.000337369	PB2
1	177	2127	0.000337369	PB2
1	256	2084	0.000337369	PB2
1	199	2048	0.000337369	PB2
1	239	2150	0.000337369	PB2
1	199	1581	0.000337369	PB2
1	259	2203	0.000337369	PB2
1	211	2254	0.000337369	PB2
1	231	2213	0.000337369	PB2
1	173	2212	0.000337369	PB2
1	212	2248	0.000337369	PB2
1	212	2237	0.000337369	PB2
1	234	2270	0.000337369	PB2
1	237	2209	0.000337369	PB2
1	222	2239	0.000337369	PB2
1	234	2157	0.000337369	PB2
1	239	2085	0.000337369	PB2
3	265	2157	0.00101211	PB2
1	199	2144	0.000337369	PB2
1	253	2202	0.000337369	PB2
1	244	2176	0.000337369	PB2
1	225	2157	0.000337369	PB2
1	238	1952	0.000337369	PB2
1	234	2006	0.000337369	PB2
2	254	2087	0.000674738	PB2
1	230	2068	0.000337369	PB2
1	187	2224	0.000337369	PB2
1	194	2233	0.000337369	PB2
1	255	2300	0.000337369	PB2
1	221	2259	0.000337369	PB2
1	197	1519	0.000337369	PB2
1	187	2228	0.000337369	PB2
1	208	2219	0.000337369	PB2
1	179	1977	0.000337369	PB2
1	250	2287	0.000337369	PB2
1	232	2242	0.000337369	PB2
1	215	2234	0.000337369	PB2
1	211	2237	0.000337369	PB2
1	250	2158	0.000337369	PB2
1	195	2209	0.000337369	PB2
2	215	2240	0.000674738	PB2
1	220	2235	0.000337369	PB2
1	251	2155	0.000337369	PB2
1	187	2030	0.000337369	PB2
1	243	2246	0.000337369	PB2
2	199	2209	0.000674738	PB2
1	208	1941	0.000337369	PB2
1	269	2271	0.000337369	PB2
1	234	2235	0.000337369	PB2
2	194	1965	0.000674738	PB2
1	221	2251	0.000337369	PB2
1	246	2275	0.000337369	PB2
1	213	2074	0.000337369	PB2
1	280	2309	0.000337369	PB2
1	252	2249	0.000337369	PB2
1	265	2111	0.000337369	PB2
1	195	2184	0.000337369	PB2
1	209	2166	0.000337369	PB2
1	204	2118	0.000337369	PB2
1	228	2035	0.000337369	PB2
1	248	2182	0.000337369	PB2
1	239	2238	0.000337369	PB2
1	261	2258	0.000337369	PB2
1	244	2267	0.000337369	PB2
1	207	2202	0.000337369	PB2
1	242	2041	0.000337369	PB2
1	238	1958	0.000337369	PB2
1	211	2080	0.000337369	PB2
1	245	2120	0.000337369	PB2
1	238	2253	0.000337369	PB2
1	283	2273	0.000337369	PB2
1	290	2302	0.000337369	PB2
1	211	2119	0.000337369	PB2
1	297	2108	0.000337369	PB2
1	300	2256	0.000337369	PB2
1	261	2241	0.000337369	PB2
1	226	2208	0.000337369	PB2
1	231	2221	0.000337369	PB2
1	289	2100	0.000337369	PB2
1	297	2301	0.000337369	PB2
1	299	2270	0.000337369	PB2
1	275	2177	0.000337369	PB2
1	237	2194	0.000337369	PB2
1	281	2260	0.000337369	PB2
1	262	2219	0.000337369	PB2
1	266	2264	0.000337369	PB2
1	227	1927	0.000337369	PB2
1	293	2230	0.000337369	PB2
1	299	2273	0.000337369	PB2
1	263	1961	0.000337369	PB2
1	257	2252	0.000337369	PB2
1	263	2248	0.000337369	PB2
1	230	2157	0.000337369	PB2
1	280	1972	0.000337369	PB2
1	273	2231	0.000337369	PB2
1	302	2185	0.000337369	PB2
1	239	2032	0.000337369	PB2
1	252	1872	0.000337369	PB2
1	280	2161	0.000337369	PB2
1	316	2301	0.000337369	PB2
1	266	2248	0.000337369	PB2
1	234	2170	0.000337369	PB2
1	280	2091	0.000337369	PB2
1	244	1540	0.000337369	PB2
1	272	2222	0.000337369	PB2
1	288	2246	0.000337369	PB2
1	300	1930	0.000337369	PB2
1	241	2156	0.000337369	PB2
2	274	1985	0.000674738	PB2
1	298	2050	0.000337369	PB2
8	331	2138	0.00269895	PB2
1	265	1683	0.000337369	PB2
1	298	2148	0.000337369	PB2
1	272	2205	0.000337369	PB2
1	278	2169	0.000337369	PB2
1	329	2271	0.000337369	PB2
1	294	2234	0.000337369	PB2
1	285	2177	0.000337369	PB2
1	328	1951	0.000337369	PB2
1	303	2084	0.000337369	PB2
1	285	2213	0.000337369	PB2
1	285	2202	0.000337369	PB2
1	319	2135	0.000337369	PB2
2	289	2220	0.000674738	PB2
1	339	2191	0.000337369	PB2
1	288	2121	0.000337369	PB2
1	317	2265	0.000337369	PB2
2	296	1852	0.000674738	PB2
1	332	2161	0.000337369	PB2
1	313	2259	0.000337369	PB2
1	322	2071	0.000337369	PB2
1	335	2152	0.000337369	PB2
1	306	2218	0.000337369	PB2
1	349	2268	0.000337369	PB2
1	292	2225	0.000337369	PB2
1	283	2209	0.000337369	PB2
2	349	2154	0.000674738	PB2
1	361	2265	0.000337369	PB2
1	328	2142	0.000337369	PB2
1	312	2218	0.000337369	PB2
1	301	2045	0.000337369	PB2
1	335	2237	0.000337369	PB2
1	317	2217	0.000337369	PB2
1	290	2226	0.000337369	PB2
1	305	2207	0.000337369	PB2
2	318	2219	0.000674738	PB2
1	300	2111	0.000337369	PB2
1	309	2206	0.000337369	PB2
1	316	2224	0.000337369	PB2
1	320	2175	0.000337369	PB2
1	316	2069	0.000337369	PB2
1	370	2215	0.000337369	PB2
1	336	2030	0.000337369	PB2
1	316	2210	0.000337369	PB2
1	389	2008	0.000337369	PB2
1	334	2220	0.000337369	PB2
1	342	2171	0.000337369	PB2
1	381	2276	0.000337369	PB2
1	349	2144	0.000337369	PB2
1	341	2218	0.000337369	PB2
1	381	2284	0.000337369	PB2
1	335	2171	0.000337369	PB2
1	393	2177	0.000337369	PB2
1	414	2227	0.000337369	PB2
1	361	2223	0.000337369	PB2
1	336	2096	0.000337369	PB2
1	408	2264	0.000337369	PB2
1	367	2210	0.000337369	PB2
1	402	2286	0.000337369	PB2
1	393	2261	0.000337369	PB2
1	370	2177	0.000337369	PB2
1	404	2251	0.000337369	PB2
1	401	2192	0.000337369	PB2
1	357	2146	0.000337369	PB2
2	432	2195	0.000674738	PB2
1	368	2237	0.000337369	PB2
1	390	2069	0.000337369	PB2
1	401	2245	0.000337369	PB2
1	431	2250	0.000337369	PB2
1	379	2005	0.000337369	PB2
1	430	2277	0.000337369	PB2
1	376	2192	0.000337369	PB2
1	442	2267	0.000337369	PB2
1	463	2303	0.000337369	PB2
2	442	2189	0.000674738	PB2
1	409	1641	0.000337369	PB2
1	438	2253	0.000337369	PB2
1	473	2267	0.000337369	PB2
1	415	2204	0.000337369	PB2
1	499	2189	0.000337369	PB2
1	439	2196	0.000337369	PB2
1	508	2274	0.000337369	PB2
1	540	2309	0.000337369	PB2
2	499	2070	0.000674738	PB2
1	541	2252	0.000337369	PB2
1	533	2260	0.000337369	PB2
1	513	2118	0.000337369	PB2
1	575	2188	0.000337369	PB2
1	537	1778	0.000337369	PB2
1	531	2008	0.000337369	PB2
1	620	1924	0.000337369	PB2
1	583	2144	0.000337369	PB2
2	666	2286	0.000674738	PB2
1	673	2105	0.000337369	PB2
1	665	2156	0.000337369	PB2
2	752	1632	0.000674738	PB2
1	784	1630	0.000337369	PB2
1	790	2269	0.000337369	PB2
1	828	936	0.000337369	PB2
1	985	1864	0.000337369	PB2
1	1047	1099	0.000337369	PB2
1	1096	1834	0.000337369	PB2
1	1126	2044	0.000337369	PB2
1	1287	1446	0.000337369	PB2
1	1600	1690	0.000337369	PB2
2	1659	2221	0.000674738	PB2
1	2041	2116	0.000337369	PB2
1	101	126	0.000337369	PB2
1	326	341	0.000337369	PB2

## Sheet: IVT-vRNAs with pseudo-DVGs
Method	Segment	DVG size	Concentration	Breakpoint start	Breakpoint end	Count	Frequency
RT-PCR-seq	PB2	424	0.5	207	2125	92607	0.609535
RT-PCR-seq	PB2	424	0.1	207	2125	10311	0.61098
RT-PCR-seq	PB2	424	0.01	207	2125	1019	0.0875314
RT-PCR-seq	PB2	424	0.001	207	2125	149	0.0108294
RT-seq	PB2	424	0.5	207	2125	1803	0.0655687
RT-seq	PB2	424	0.1	207	2125	133	0.00478486
RT-seq	PB2	424	0.01	207	2125	9	0.000234935
RT-seq	PB2	424	0.001	207	2125	1	4.76477e-05
RT-PCR-seq	PB1	425	0.5	101	2018	45072	0.482018
RT-PCR-seq	PB1	425	0.1	101	2018	2706	0.25572
RT-PCR-seq	PB1	425	0.01	101	2018	47	0.0144598
RT-PCR-seq	PB1	425	0.001	101	2018	0	0
RT-seq	PB1	425	0.5	101	2018	985	0.0444243
RT-seq	PB1	425	0.1	101	2018	86	0.00335547
RT-seq	PB1	425	0.01	101	2018	44	0.00105982
RT-seq	PB1	425	0.001	101	2018	1	3.8802e-05
RT-PCR-seq	PB2	765	0.5	364	1941	299760	0.966948
RT-PCR-seq	PB2	765	0.1	364	1941	23627	0.816668
RT-PCR-seq	PB2	765	0.01	364	1941	809	0.121727
RT-PCR-seq	PB2	765	0.001	364	1941	46	0.0098991
RT-seq	PB2	765	0.5	364	1941	16227	0.324116
RT-seq	PB2	765	0.1	364	1941	983	0.0252159
RT-seq	PB2	765	0.01	364	1941	74	0.0015737
RT-seq	PB2	765	0.001	364	1941	8	0.000169824
RT-PCR-seq	PB2	1184	0.5	556	1714	84318	0.927072
RT-PCR-seq	PB2	1184	0.1	556	1714	12685	0.664549
RT-PCR-seq	PB2	1184	0.01	556	1714	302	0.0607723
RT-PCR-seq	PB2	1184	0.001	556	1714	23	0.00261019
RT-seq	PB2	1184	0.5	556	1714	26429	0.380537
RT-seq	PB2	1184	0.1	556	1714	3495	0.0515465
RT-seq	PB2	1184	0.01	556	1714	212	0.00373081
RT-seq	PB2	1184	0.001	556	1714	12	0.00027134
