# Supplementary material
Source: HighWire-hosted journal article supplement (doi:10.1101/rna.077529.120)
Supplement: Supplemental_Table_S2.xlsx [file Supplemental_Table_S2.xlsx]

## Sheet: Table S2 Description
Supplemental Table S2 (related to Figure 2) ∣ Reproducibility of the DG-seq pipeline.
Tab "RT-seq" (related to Figure 2A) ∣ DG-seq data obtained upon RT-seq on vRNAs extracted from the PA-K635A, PA-R638A or WT viral stocks in two independent experiments #1 and #2
Tab "RT-PCR-seq" (related to Figure 2B) ∣ DG-seq data obtained upon RT-PCR-seq on vRNAs extracted from the PA-K635A, PA-R638A or WT viral stocks in two independent experiments #1 and #2
Tab "RT-seq vs RT-PCR-seq" (related to Figure 2C-D) ∣ DG-seq data obtained upon RT-seq or RT-PCR-seq on vRNAs extracted from the PA-K635A, PA-R638A or WT viral stocks in the experiment #1

## Sheet: RT–seq
Virus	Segment	Deletion length	Breakpoint start	Breakpoint end	Count expt1	Frequency expt1	Count expt2	Frequency expt2
PA-K635A	PB2	1816	192	2009	1493	0.0478022	339	0.0275484
PA-K635A	PB2	1917	199	2117	30	0.000960526	6	0.000487583
PA-K635A	PB2	1686	294	1981	284	0.00909298	58	0.0047133
PA-K635A	PB2	1576	333	1910	85	0.00272149	29	0.00235665
PA-K635A	PB2	1467	360	1828	376	0.0120386	151	0.0122708
PA-K635A	PB2	1255	496	1752	72	0.00230526	33	0.0026817
PA-K635A	PB2	1104	630	1735	236	0.00755614	115	0.00934534
PA-K635A	PB2	900	631	1532	25	0.000800439	10	0.000812638
PA-K635A	PB2	46	1782	1829	27	0.000864474	14	0.00113769
PA-K635A	PB2	88	1810	1899	50	0.00160088	22	0.0017878
PA-K635A	PB2	72	1996	2069	29	0.000928509	8	0.00065011
PA-K635A	PB1	875	128	1004	26	0.00117028	12	0.00110636
PA-K635A	PB1	1951	128	2080	57	0.00256561	8	0.000737576
PA-K635A	PB1	1541	254	1796	22	0.000990235	8	0.000737576
PA-K635A	PB1	237	296	534	18	0.000810192	2	0.000184394
PA-K635A	PB1	1410	395	1806	31	0.00139533	8	0.000737576
PA-K635A	PB1	179	560	740	22	0.000990235	12	0.00110636
PA-K635A	PB1	1257	574	1832	29	0.00130531	13	0.00119856
PA-K635A	PB1	1297	577	1875	377	0.016969	163	0.0150281
PA-K635A	PB1	1014	630	1645	33	0.00148535	15	0.00138295
PA-K635A	PB1	945	645	1591	26	0.00117028	12	0.00110636
PA-K635A	PB1	867	711	1579	171	0.00769682	84	0.00774455
PA-K635A	PB1	761	781	1543	26	0.00117028	17	0.00156735
PA-K635A	PB1	649	807	1457	70	0.00315075	38	0.00350349
PA-K635A	PB1	259	921	1181	48	0.00216051	14	0.00129076
PA-K635A	PB1	155	954	1110	58	0.00261062	21	0.00193614
PA-K635A	PB1	156	994	1151	40	0.00180043	15	0.00138295
PA-K635A	PB1	376	997	1374	43	0.00193546	21	0.00193614
PA-K635A	PB1	313	1080	1394	20	0.000900213	12	0.00110636
PA-K635A	PB1	109	1816	1926	32	0.00144034	8	0.000737576
PA-K635A	PA	1942	83	2026	28	0.0011023	3	0.000270027
PA-K635A	PA	1558	312	1871	676	0.0266126	207	0.0186319
PA-K635A	PA	1501	381	1883	336	0.0132276	125	0.0112511
PA-K635A	PA	1323	386	1710	276	0.0108655	120	0.0108011
PA-K635A	PA	1190	413	1604	120	0.00472413	69	0.00621063
PA-K635A	PA	1199	474	1674	150	0.00590516	60	0.00540055
PA-K635A	PA	966	501	1468	2279	0.089719	947	0.0852386
PA-K635A	PA	895	554	1450	199	0.00783418	58	0.00522053
PA-K635A	PA	1153	555	1709	65	0.0025589	25	0.00225023
PA-K635A	PA	812	595	1408	180	0.00708619	65	0.00585059
PA-K635A	PA	804	655	1460	27	0.00106293	9	0.000810082
PA-K635A	PA	870	762	1633	17	0.000669251	13	0.00117012
PA-K635A	PA	47	1283	1331	17	0.000669251	6	0.000540055
PA-K635A	PA	85	1873	1959	256	0.0100781	89	0.00801081
PA-K635A	PA	42	1945	1988	27	0.00106293	11	0.0009901
PA-K635A	NS	173	332	506	32	0.00150874	10	0.00134935
PA-K635A	NP	1142	143	1286	53	0.00120567	8	0.000438983
PA-K635A	NP	74	553	628	42	0.000955436	14	0.00076822
PA-K635A	NP	236	582	819	78	0.00177438	38	0.00208517
PA-K635A	NP	11	627	639	16	0.000363976	5	0.000274364
PA-K635A	NP	20	1063	1084	27	0.000614209	13	0.000713347
PA-K635A	NA	765	193	959	80	0.00259595	17	0.0013953
PA-K635A	NA	610	344	955	202	0.00655476	77	0.00631989
PA-K635A	NA	604	346	951	218	0.00707395	62	0.00508874
PA-K635A	NA	37	731	769	21	0.000681436	9	0.000738688
PA-K635A	NA	456	870	1327	15	0.00048674	3	0.000246229
PA-K635A	M	242	462	705	18	0.00054633	8	0.000575439
PA-K635A	M	76	501	578	25	0.000758792	15	0.00107895
PA-K635A	HA	936	368	1305	37	0.00133086	8	0.00066792
PA-K635A	HA	420	696	1117	52	0.0018704	14	0.00116886
PA-K635A	HA	326	699	1026	16	0.000575507	8	0.00066792
PA-K635A	HA	74	788	863	59	0.00212218	31	0.00258819
PA-K635A	HA	163	1041	1205	20	0.000719384	9	0.00075141
PA-K635A	HA	21	1203	1225	23	0.000827292	6	0.00050094
PA-K635A	HA	69	1284	1354	28	0.00100714	10	0.0008349
PA-R368A	PB1	1244	524	1769	25	0.00305287	22	0.00457098
PA-R368A	PB1	27	794	822	27	0.0032971	19	0.00394767
PA-R368A	PB1	12	939	952	85	0.0103798	41	0.00851865
PA-R368A	PA	1619	254	1874	20	0.00189477	8	0.00141741
PA-R368A	PA	1466	364	1831	20	0.00189477	8	0.00141741
PA-R368A	PA	886	491	1378	73	0.00691591	54	0.00956755
PA-R368A	PA	1191	518	1710	886	0.0839383	545	0.0965614
PA-R368A	PA	982	557	1540	334	0.0316427	174	0.0308288
PA-R368A	PA	1112	647	1760	319	0.0302216	196	0.0347267
PA-R368A	PA	805	770	1576	1625	0.15395	1078	0.190997
PA-R368A	NS	22	423	446	27	0.00475358	18	0.005657
PA-R368A	NA	207	582	790	181	0.021629	115	0.0251455
PA-R368A	HA	983	293	1277	63	0.00654048	41	0.00647186
WT	PB2	1401	424	1826	16	0.000675514	9	0.000706773
WT	PB1	1544	347	1892	146	0.00920525	68	0.00654341
WT	PB1	1298	429	1728	31	0.00195454	16	0.00153963
WT	PA	1699	244	1944	23	0.00123642	13	0.00112575
WT	PA	1634	284	1919	16	0.000860115	7	0.000606174
WT	PA	1540	300	1841	18	0.00096763	7	0.000606174
WT	PA	1331	366	1698	9	0.000483815	14	0.00121235

## Sheet: RT–PCR–seq
Virus	Segment	Deletion length	Breakpoint start	Breakpoint end	Count expt1	Frequency expt1	Count expt2	Frequency expt2
PA-K635A	PB2	1816	191	2008	60	0.00089232	26	0.00112782
PA-K635A	PB2	1816	192	2009	41657	0.619523	14023	0.608285
PA-K635A	PB2	1816	196	2013	64	0.000951808	21	0.000910931
PA-K635A	PB2	1917	199	2117	948	0.0140987	240	0.0104106
PA-K635A	PB2	1751	248	2000	24	0.000356928	13	0.00056391
PA-K635A	PB2	1686	294	1981	4823	0.0717277	1682	0.0729613
PA-K635A	PB2	1576	333	1910	928	0.0138012	379	0.0164401
PA-K635A	PB2	1421	351	1773	110	0.00163592	62	0.00268942
PA-K635A	PB2	1467	360	1828	3350	0.0498212	1487	0.0645026
PA-K635A	PB2	1331	440	1772	18	0.000267696	0	0
PA-K635A	PB2	1255	496	1752	256	0.00380723	140	0.00607288
PA-K635A	PB2	1331	497	1829	15	0.00022308	8	0.000347021
PA-K635A	PB2	1366	514	1881	82	0.0012195	32	0.00138809
PA-K635A	PB2	1303	620	1924	28	0.000416416	24	0.00104106
PA-K635A	PB2	1104	630	1735	715	0.0106335	323	0.014011
PA-K635A	PB2	900	631	1532	65	0.000966681	24	0.00104106
PA-K635A	PB2	1284	670	1955	42	0.000624624	22	0.000954309
PA-K635A	PB2	1431	673	2105	26	0.000386672	9	0.000390399
PA-K635A	PB2	1334	742	2077	15	0.00022308	12	0.000520532
PA-K635A	PB2	88	1810	1899	30	0.00044616	8	0.000347021
PA-K635A	PB1	29	83	113	16	0.00091584	18	0.00228379
PA-K635A	PB1	875	128	1004	34	0.00194616	8	0.00101502
PA-K635A	PB1	1951	128	2080	1462	0.0836849	381	0.0483401
PA-K635A	PB1	1851	159	2011	35	0.0020034	25	0.00317192
PA-K635A	PB1	1768	211	1980	46	0.00263304	25	0.00317192
PA-K635A	PB1	1541	254	1796	151	0.00864324	70	0.00888139
PA-K635A	PB1	1410	395	1806	120	0.0068688	58	0.00735886
PA-K635A	PB1	1393	476	1870	43	0.00246132	22	0.00279129
PA-K635A	PB1	1114	509	1624	31	0.00177444	14	0.00177628
PA-K635A	PB1	1301	555	1857	25	0.001431	20	0.00253754
PA-K635A	PB1	179	560	740	15	0.0008586	9	0.00114189
PA-K635A	PB1	1122	566	1689	28	0.00160272	16	0.00203003
PA-K635A	PB1	1257	574	1832	151	0.00864324	110	0.0139565
PA-K635A	PB1	1297	577	1875	1998	0.114366	1129	0.143244
PA-K635A	PB1	1014	630	1645	89	0.00509436	46	0.00583634
PA-K635A	PB1	945	645	1591	65	0.0037206	34	0.00431382
PA-K635A	PB1	867	711	1579	310	0.0177444	148	0.0187778
PA-K635A	PB1	761	781	1543	46	0.00263304	19	0.00241066
PA-K635A	PB1	649	807	1457	90	0.0051516	46	0.00583634
PA-K635A	PB1	259	921	1181	32	0.00183168	9	0.00114189
PA-K635A	PB1	155	954	1110	41	0.00234684	20	0.00253754
PA-K635A	PB1	156	994	1151	25	0.001431	11	0.00139565
PA-K635A	PB1	376	997	1374	30	0.0017172	26	0.0032988
PA-K635A	PB1	109	1816	1926	97	0.00555228	34	0.00431382
PA-K635A	PA	1942	83	2026	942	0.0192764	226	0.0118548
PA-K635A	PA	1829	128	1958	45	0.000920847	5	0.000262275
PA-K635A	PA	1675	160	1836	17	0.000347876	10	0.00052455
PA-K635A	PA	1558	312	1871	11592	0.23721	4214	0.221046
PA-K635A	PA	1558	313	1872	53	0.00108455	18	0.000944191
PA-K635A	PA	1646	351	1998	22	0.000450192	4	0.00020982
PA-K635A	PA	1501	381	1883	4953	0.101355	1768	0.0927405
PA-K635A	PA	1501	382	1884	16	0.000327412	1	5.2455e-05
PA-K635A	PA	1323	386	1710	2880	0.0589342	1381	0.0724404
PA-K635A	PA	1190	413	1604	847	0.0173324	392	0.0205624
PA-K635A	PA	983	455	1439	44	0.000900384	13	0.000681915
PA-K635A	PA	1199	474	1674	828	0.0169436	363	0.0190412
PA-K635A	PA	966	500	1467	60	0.0012278	20	0.0010491
PA-K635A	PA	966	501	1468	10699	0.218937	4673	0.245122
PA-K635A	PA	966	502	1469	14	0.000286486	9	0.000472095
PA-K635A	PA	895	554	1450	641	0.013117	313	0.0164184
PA-K635A	PA	1153	555	1709	305	0.0062413	135	0.00708143
PA-K635A	PA	812	595	1408	522	0.0106818	265	0.0139006
PA-K635A	PA	804	655	1460	45	0.000920847	20	0.0010491
PA-K635A	PA	870	762	1633	39	0.000798068	24	0.00125892
PA-K635A	PA	47	1283	1331	17	0.000347876	5	0.000262275
PA-K635A	PA	85	1873	1959	148	0.00302856	52	0.00272766
PA-K635A	PA	42	1945	1988	57	0.00116641	27	0.00141629
PA-K635A	NS	226	317	544	14	0.000299347	4	0.000173176
PA-K635A	NS	173	332	506	68	0.00145397	23	0.00099576
PA-K635A	NS	63	352	416	14	0.000299347	4	0.000173176
PA-K635A	NS	73	355	429	31	0.000662839	7	0.000303057
PA-K635A	NS	121	409	531	20	0.000427638	7	0.000303057
PA-K635A	NS	12	609	622	19	0.000406256	4	0.000173176
PA-K635A	NP	1142	143	1286	197	0.00534044	57	0.00365947
PA-K635A	NP	897	436	1334	39	0.00105724	14	0.000898818
PA-K635A	NP	888	438	1327	27	0.000731939	12	0.000770415
PA-K635A	NP	908	476	1385	12	0.000325306	16	0.00102722
PA-K635A	NP	915	479	1395	30	0.000813265	26	0.00166923
PA-K635A	NP	74	553	628	39	0.00105724	8	0.00051361
PA-K635A	NP	236	582	819	76	0.00206027	44	0.00282486
PA-K635A	NP	11	627	639	20	0.000542177	5	0.000321006
PA-K635A	NP	20	1063	1084	26	0.00070483	6	0.000385208
PA-K635A	NA	765	193	959	289	0.00754742	103	0.00697197
PA-K635A	NA	725	271	997	51	0.0013319	24	0.00162454
PA-K635A	NA	610	344	955	659	0.0172102	192	0.0129963
PA-K635A	NA	604	346	951	686	0.0179153	212	0.0143501
PA-K635A	NA	37	731	769	29	0.000757353	10	0.00067689
PA-K635A	M	74	353	428	22	9.89414e-05	14	0.000154337
PA-K635A	M	252	397	650	16	7.19574e-05	16	0.000176385
PA-K635A	M	242	462	705	146	0.000656611	52	0.000573251
PA-K635A	M	74	478	553	116	0.000521691	72	0.000793732
PA-K635A	M	76	501	578	244	0.00109735	87	0.000959093
PA-K635A	M	141	511	653	31	0.000139417	13	0.000143313
PA-K635A	M	25	749	775	42	0.000188888	7	7.71684e-05
PA-K635A	M	34	894	929	20	8.99468e-05	16	0.000176385
PA-K635A	HA	936	368	1305	116	0.0030868	29	0.00233818
PA-K635A	HA	420	696	1117	89	0.00236832	26	0.0020963
PA-K635A	HA	74	788	863	75	0.00199577	25	0.00201567
PA-K635A	HA	163	1041	1205	20	0.000532206	4	0.000322507
PA-K635A	HA	21	1203	1225	21	0.000558817	7	0.000564388
PA-K635A	HA	69	1284	1354	16	0.000425765	5	0.000403134
PA-R368A	PB2	2010	115	2126	26	0.00183249	3	0.000335483
PA-R368A	PB2	1616	244	1861	22	0.00155057	15	0.00167742
PA-R368A	PB2	1599	301	1901	14	0.000986724	7	0.000782794
PA-R368A	PB2	1607	406	2014	37	0.00260777	26	0.00290752
PA-R368A	PB2	1569	424	1994	42	0.00296017	15	0.00167742
PA-R368A	PB2	1303	620	1924	41	0.00288969	36	0.0040258
PA-R368A	PB2	1431	673	2105	41	0.00288969	29	0.00324301
PA-R368A	PB2	1334	742	2077	27	0.00190297	20	0.00223656
PA-R368A	PB1	1852	134	1987	264	0.0352817	126	0.0265231
PA-R368A	PB1	1851	159	2011	33	0.00441022	18	0.00378902
PA-R368A	PB1	1244	524	1769	386	0.0515862	258	0.0543093
PA-R368A	PB1	1301	555	1857	15	0.00200464	15	0.00315752
PA-R368A	PB1	27	794	822	30	0.00400929	33	0.00694653
PA-R368A	PB1	12	939	952	55	0.00735036	43	0.00905154
PA-R368A	PA	1863	162	2026	335	0.00640463	102	0.00333368
PA-R368A	PA	1619	254	1874	479	0.00915766	163	0.00532735
PA-R368A	PA	1485	278	1764	16	0.000305893	8	0.000261465
PA-R368A	PA	1466	364	1831	538	0.0102856	252	0.00823615
PA-R368A	PA	1181	432	1614	27	0.000516194	20	0.000653663
PA-R368A	PA	886	491	1378	595	0.0113754	401	0.0131059
PA-R368A	PA	1191	517	1709	17	0.000325011	20	0.000653663
PA-R368A	PA	1191	518	1710	18557	0.354778	11697	0.382295
PA-R368A	PA	1191	519	1711	34	0.000650022	20	0.000653663
PA-R368A	PA	982	557	1540	3297	0.063033	2115	0.0691248
PA-R368A	PA	1069	562	1632	15	0.000286774	20	0.000653663
PA-R368A	PA	1112	647	1760	4003	0.0765305	2568	0.0839303
PA-R368A	PA	805	770	1576	8930	0.170726	5931	0.193844
PA-R368A	PA	20	1977	1998	18	0.000344129	6	0.000196099
PA-R368A	NS	73	355	429	19	0.000444577	14	0.00061771
PA-R368A	NS	22	423	446	341	0.00797898	192	0.00847145
PA-R368A	NP	1086	242	1329	45	0.0016902	18	0.00136887
PA-R368A	NP	823	311	1135	23	0.000863882	4	0.000304193
PA-R368A	NP	897	436	1334	21	0.000788762	15	0.00114073
PA-R368A	NP	888	438	1327	20	0.000751202	11	0.000836532
PA-R368A	NP	908	476	1385	16	0.000600961	14	0.00106468
PA-R368A	NA	725	271	997	41	0.00123983	18	0.00105467
PA-R368A	NA	564	283	848	62	0.00187487	33	0.00193357
PA-R368A	NA	162	582	745	36	0.00108863	18	0.00105467
PA-R368A	NA	207	582	790	960	0.0290302	471	0.0275973
PA-R368A	M	74	353	428	14	6.87534e-05	4	3.66178e-05
PA-R368A	M	74	478	553	60	0.000294658	57	0.000521804
PA-R368A	HA	983	293	1277	773	0.0350309	290	0.0267308
PA-R368A	HA	296	736	1033	48	0.00217527	25	0.00230438
WT	PB2	1828	228	2057	18	0.000740355	7	0.00079744
WT	PB2	1368	397	1766	15	0.000616963	12	0.00136704
WT	PB2	1401	424	1826	242	0.00995367	136	0.0154931
WT	PB2	1389	497	1887	32	0.00131619	13	0.00148096
WT	PB2	1062	559	1622	87	0.00357838	29	0.00330368
WT	PB2	1528	580	2109	16	0.000658094	7	0.00079744
WT	PB2	1303	620	1924	32	0.00131619	40	0.0045568
WT	PB2	1431	673	2105	150	0.00616963	65	0.0074048
WT	PB2	1250	676	1927	14	0.000575832	9	0.00102528
WT	PB2	1334	742	2077	39	0.0016041	7	0.00079744
WT	PB1	2052	75	2128	18	0.00121045	10	0.00143543
WT	PB1	2029	134	2164	65	0.00437106	23	0.00330148
WT	PB1	2027	135	2163	317	0.0213173	133	0.0190912
WT	PB1	1961	146	2108	112	0.00753167	49	0.00703359
WT	PB1	1851	159	2011	76	0.00511078	34	0.00488045
WT	PB1	1879	166	2046	73	0.00490903	26	0.00373211
WT	PB1	1804	189	1994	29	0.00195016	18	0.00258377
WT	PB1	1933	193	2127	40	0.00268988	8	0.00114834
WT	PB1	1886	215	2102	16	0.00107595	6	0.000861255
WT	PB1	1928	256	2185	225	0.0151306	78	0.0111963
WT	PB1	1630	303	1934	151	0.0101543	86	0.0123447
WT	PB1	1597	305	1903	25	0.00168118	11	0.00157897
WT	PB1	1725	314	2040	17	0.0011432	9	0.00129188
WT	PB1	1701	315	2017	76	0.00511078	32	0.00459336
WT	PB1	1618	319	1938	372	0.0250159	179	0.0256941
WT	PB1	1574	320	1895	32	0.00215191	11	0.00157897
WT	PB1	1552	327	1880	131	0.00880936	63	0.00904318
WT	PB1	1753	343	2097	405	0.0272351	144	0.0206701
WT	PB1	1544	347	1892	5011	0.336975	2291	0.328856
WT	PB1	1576	350	1927	15	0.00100871	5	0.000717713
WT	PB1	1483	356	1840	24	0.00161393	11	0.00157897
WT	PB1	1553	361	1915	15	0.00100871	12	0.00172251
WT	PB1	1487	366	1854	16	0.00107595	11	0.00157897
WT	PB1	1298	429	1728	335	0.0225278	176	0.0252635
WT	PB1	1301	555	1857	14	0.000941459	19	0.00272731
WT	PB1	42	1982	2025	19	0.00127769	11	0.00157897
WT	PB1	25	2083	2109	73	0.00490903	31	0.00444982
WT	PB1	16	2228	2245	14	0.000941459	9	0.00129188
WT	PA	1952	121	2074	103	0.00459459	32	0.00382508
WT	PA	1813	137	1951	68	0.00303332	16	0.00191254
WT	PA	1868	156	2025	133	0.00593281	32	0.00382508
WT	PA	1839	161	2001	25	0.00111519	10	0.00119534
WT	PA	1796	181	1978	14	0.000624507	5	0.000597669
WT	PA	1731	183	1915	16	0.000713722	4	0.000478135
WT	PA	1729	200	1930	29	0.00129362	8	0.00095627
WT	PA	1737	205	1943	62	0.00276567	26	0.00310788
WT	PA	1769	208	1978	40	0.0017843	11	0.00131487
WT	PA	1693	224	1918	39	0.0017397	13	0.00155394
WT	PA	1702	230	1933	15	0.000669114	6	0.000717202
WT	PA	1765	243	2009	45	0.00200734	10	0.00119534
WT	PA	1699	244	1944	2648	0.118121	869	0.103875
WT	PA	1644	257	1902	310	0.0138284	143	0.0170933
WT	PA	1563	270	1834	28	0.00124901	12	0.0014344
WT	PA	1605	276	1882	702	0.0313146	250	0.0298834
WT	PA	1634	284	1919	1719	0.0766805	541	0.0646677
WT	PA	1540	300	1841	1094	0.0488007	442	0.0528339
WT	PA	1331	366	1698	316	0.014096	147	0.0175715
WT	PA	1361	389	1751	37	0.00165048	15	0.00179301
WT	PA	1298	398	1697	18	0.000802937	20	0.00239067
WT	PA	1304	409	1714	41	0.00182891	25	0.00298834
WT	PA	1280	449	1730	31	0.00138284	22	0.00262974
WT	NS	73	355	429	19	0.000567843	6	0.000246229
WT	NP	897	436	1334	36	0.0014096	9	0.000648404
WT	NP	888	438	1327	39	0.00152706	18	0.00129681
WT	NP	908	476	1385	33	0.00129213	18	0.00129681
WT	NP	915	479	1395	29	0.00113551	18	0.00129681
WT	NP	913	487	1401	15	0.000587332	3	0.000216135
WT	NA	725	271	997	14	0.000490134	18	0.00117644
WT	M	74	353	428	49	0.000235565	21	0.000199088
WT	M	74	478	553	74	0.000355751	82	0.00077739
WT	M	141	511	653	28	0.000134608	18	0.000170647
WT	M	102	601	704	22	0.000105764	8	7.58429e-05
WT	M	44	619	664	24	0.000115379	8	7.58429e-05
WT	M	140	622	763	16	7.69191e-05	7	6.63626e-05
WT	M	63	639	703	19	9.13415e-05	5	4.74018e-05
WT	M	34	894	929	6	2.88447e-05	17	0.000161166
WT	HA	1236	208	1445	85	0.00375423	44	0.00413889
WT	HA	1213	231	1445	42	0.00185503	17	0.00159912

## Sheet: RT–seq vs RT–PCR–seq
Virus	Segment	Deletion length	Breakpoint start	Breakpoint end	Count RT-seq	Frequency RT-seq	Count RT-PCR-seq	Frequency RT-PCR-seq
PA-K635A	PB2	1816	191	2008	3	9.60526e-05	60	0.00089232
PA-K635A	PB2	1816	192	2009	1493	0.0478022	41657	0.619523
PA-K635A	PB2	1816	196	2013	2	6.40351e-05	64	0.000951808
PA-K635A	PB2	1917	199	2117	30	0.000960526	948	0.0140987
PA-K635A	PB2	1751	248	2000	3	9.60526e-05	24	0.000356928
PA-K635A	PB2	1686	294	1981	284	0.00909298	4823	0.0717277
PA-K635A	PB2	1576	333	1910	85	0.00272149	928	0.0138012
PA-K635A	PB2	1421	351	1773	13	0.000416228	110	0.00163592
PA-K635A	PB2	1467	360	1828	376	0.0120386	3350	0.0498212
PA-K635A	PB2	1331	440	1772	6	0.000192105	18	0.000267696
PA-K635A	PB2	1255	496	1752	72	0.00230526	256	0.00380723
PA-K635A	PB2	1331	497	1829	5	0.000160088	15	0.00022308
PA-K635A	PB2	1366	514	1881	13	0.000416228	82	0.0012195
PA-K635A	PB2	1104	630	1735	236	0.00755614	715	0.0106335
PA-K635A	PB2	900	631	1532	25	0.000800439	65	0.000966681
PA-K635A	PB2	1284	670	1955	1	3.20175e-05	42	0.000624624
PA-K635A	PB2	46	1782	1829	27	0.000864474	10	0.00014872
PA-K635A	PB2	88	1810	1899	50	0.00160088	30	0.00044616
PA-K635A	PB2	72	1996	2069	29	0.000928509	7	0.000104104
PA-K635A	PB2	1303	620	1924	0	0	28	0.000416416
PA-K635A	PB2	1431	673	2105	0	0	26	0.000386672
PA-K635A	PB2	1334	742	2077	0	0	15	0.00022308
PA-K635A	PB1	29	83	113	13	0.000585139	16	0.00091584
PA-K635A	PB1	875	128	1004	26	0.00117028	34	0.00194616
PA-K635A	PB1	1951	128	2080	57	0.00256561	1462	0.0836849
PA-K635A	PB1	1768	211	1980	4	0.000180043	46	0.00263304
PA-K635A	PB1	1541	254	1796	22	0.000990235	151	0.00864324
PA-K635A	PB1	237	296	534	18	0.000810192	3	0.00017172
PA-K635A	PB1	1410	395	1806	31	0.00139533	120	0.0068688
PA-K635A	PB1	1393	476	1870	5	0.000225053	43	0.00246132
PA-K635A	PB1	1114	509	1624	9	0.000405096	31	0.00177444
PA-K635A	PB1	179	560	740	22	0.000990235	15	0.0008586
PA-K635A	PB1	1122	566	1689	12	0.000540128	28	0.00160272
PA-K635A	PB1	1257	574	1832	29	0.00130531	151	0.00864324
PA-K635A	PB1	1297	577	1875	377	0.016969	1998	0.114366
PA-K635A	PB1	1014	630	1645	33	0.00148535	89	0.00509436
PA-K635A	PB1	945	645	1591	26	0.00117028	65	0.0037206
PA-K635A	PB1	867	711	1579	171	0.00769682	310	0.0177444
PA-K635A	PB1	761	781	1543	26	0.00117028	46	0.00263304
PA-K635A	PB1	649	807	1457	70	0.00315075	90	0.0051516
PA-K635A	PB1	259	921	1181	48	0.00216051	32	0.00183168
PA-K635A	PB1	155	954	1110	58	0.00261062	41	0.00234684
PA-K635A	PB1	156	994	1151	40	0.00180043	25	0.001431
PA-K635A	PB1	376	997	1374	43	0.00193546	30	0.0017172
PA-K635A	PB1	313	1080	1394	20	0.000900213	0	0
PA-K635A	PB1	109	1816	1926	32	0.00144034	97	0.00555228
PA-K635A	PB1	1851	159	2011	0	0	35	0.0020034
PA-K635A	PB1	1301	555	1857	0	0	25	0.001431
PA-K635A	PA	1942	83	2026	28	0.0011023	942	0.0192764
PA-K635A	PA	1829	128	1958	2	7.87354e-05	45	0.000920847
PA-K635A	PA	1675	160	1836	1	3.93677e-05	17	0.000347876
PA-K635A	PA	1558	312	1871	676	0.0266126	11592	0.23721
PA-K635A	PA	1558	313	1872	1	3.93677e-05	53	0.00108455
PA-K635A	PA	1501	381	1883	336	0.0132276	4953	0.101355
PA-K635A	PA	1323	386	1710	276	0.0108655	2880	0.0589342
PA-K635A	PA	1190	413	1604	120	0.00472413	847	0.0173324
PA-K635A	PA	983	455	1439	7	0.000275574	44	0.000900384
PA-K635A	PA	1199	474	1674	150	0.00590516	828	0.0169436
PA-K635A	PA	966	500	1467	5	0.000196839	60	0.0012278
PA-K635A	PA	966	501	1468	2279	0.089719	10699	0.218937
PA-K635A	PA	966	502	1469	1	3.93677e-05	14	0.000286486
PA-K635A	PA	895	554	1450	199	0.00783418	641	0.013117
PA-K635A	PA	1153	555	1709	65	0.0025589	305	0.0062413
PA-K635A	PA	812	595	1408	180	0.00708619	522	0.0106818
PA-K635A	PA	804	655	1460	27	0.00106293	45	0.000920847
PA-K635A	PA	870	762	1633	17	0.000669251	39	0.000798068
PA-K635A	PA	47	1283	1331	17	0.000669251	17	0.000347876
PA-K635A	PA	85	1873	1959	256	0.0100781	148	0.00302856
PA-K635A	PA	42	1945	1988	27	0.00106293	57	0.00116641
PA-K635A	PA	1646	351	1998	0	0	22	0.000450192
PA-K635A	PA	1501	382	1884	0	0	16	0.000327412
PA-K635A	NS	173	332	506	32	0.00150874	68	0.00145397
PA-K635A	NS	12	609	622	11	0.00051863	19	0.000406256
PA-K635A	NS	226	317	544	0	0	14	0.000299347
PA-K635A	NS	63	352	416	0	0	14	0.000299347
PA-K635A	NS	73	355	429	0	0	31	0.000662839
PA-K635A	NS	121	409	531	0	0	20	0.000427638
PA-K635A	NP	1142	143	1286	53	0.00120567	197	0.00534044
PA-K635A	NP	74	553	628	42	0.000955436	39	0.00105724
PA-K635A	NP	236	582	819	78	0.00177438	76	0.00206027
PA-K635A	NP	11	627	639	16	0.000363976	20	0.000542177
PA-K635A	NP	20	1063	1084	27	0.000614209	26	0.00070483
PA-K635A	NP	897	436	1334	0	0	39	0.00105724
PA-K635A	NP	888	438	1327	0	0	27	0.000731939
PA-K635A	NP	915	479	1395	0	0	30	0.000813265
PA-K635A	NA	765	193	959	80	0.00259595	289	0.00754742
PA-K635A	NA	610	344	955	202	0.00655476	659	0.0172102
PA-K635A	NA	604	346	951	218	0.00707395	686	0.0179153
PA-K635A	NA	37	731	769	21	0.000681436	29	0.000757353
PA-K635A	NA	456	870	1327	15	0.00048674	5	0.000130578
PA-K635A	NA	725	271	997	0	0	51	0.0013319
PA-K635A	M	252	397	650	2	6.07033e-05	16	7.19574e-05
PA-K635A	M	242	462	705	18	0.00054633	146	0.000656611
PA-K635A	M	76	501	578	25	0.000758792	244	0.00109735
PA-K635A	M	141	511	653	1	3.03517e-05	31	0.000139417
PA-K635A	M	25	749	775	3	9.1055e-05	42	0.000188888
PA-K635A	M	74	353	428	0	0	22	9.89414e-05
PA-K635A	M	74	478	553	0	0	116	0.000521691
PA-K635A	M	34	894	929	0	0	20	8.99468e-05
PA-K635A	HA	936	368	1305	37	0.00133086	116	0.0030868
PA-K635A	HA	420	696	1117	52	0.0018704	89	0.00236832
PA-K635A	HA	326	699	1026	16	0.000575507	0	0
PA-K635A	HA	74	788	863	59	0.00212218	75	0.00199577
PA-K635A	HA	163	1041	1205	20	0.000719384	20	0.000532206
PA-K635A	HA	21	1203	1225	23	0.000827292	21	0.000558817
PA-K635A	HA	69	1284	1354	28	0.00100714	16	0.000425765
PA-R368A	PB2	2010	115	2126	1	8.66254e-05	26	0.00183249
PA-R368A	PB2	1599	301	1901	2	0.000173251	14	0.000986724
PA-R368A	PB2	1607	406	2014	2	0.000173251	37	0.00260777
PA-R368A	PB2	1616	244	1861	0	0	22	0.00155057
PA-R368A	PB2	1569	424	1994	0	0	42	0.00296017
PA-R368A	PB2	1303	620	1924	0	0	41	0.00288969
PA-R368A	PB2	1431	673	2105	0	0	41	0.00288969
PA-R368A	PB2	1334	742	2077	0	0	27	0.00190297
PA-R368A	PB1	1852	134	1987	8	0.00097692	264	0.0352817
PA-R368A	PB1	1244	524	1769	25	0.00305287	386	0.0515862
PA-R368A	PB1	27	794	822	27	0.0032971	30	0.00400929
PA-R368A	PB1	12	939	952	85	0.0103798	55	0.00735036
PA-R368A	PB1	1851	159	2011	0	0	33	0.00441022
PA-R368A	PB1	1301	555	1857	0	0	15	0.00200464
PA-R368A	PA	1863	162	2026	4	0.000378954	335	0.00640463
PA-R368A	PA	1619	254	1874	20	0.00189477	479	0.00915766
PA-R368A	PA	1485	278	1764	3	0.000284215	16	0.000305893
PA-R368A	PA	1466	364	1831	20	0.00189477	538	0.0102856
PA-R368A	PA	886	491	1378	73	0.00691591	595	0.0113754
PA-R368A	PA	1191	518	1710	886	0.0839383	18557	0.354778
PA-R368A	PA	1191	519	1711	1	9.47385e-05	34	0.000650022
PA-R368A	PA	982	557	1540	334	0.0316427	3297	0.063033
PA-R368A	PA	1069	562	1632	1	9.47385e-05	15	0.000286774
PA-R368A	PA	1112	647	1760	319	0.0302216	4003	0.0765305
PA-R368A	PA	805	770	1576	1625	0.15395	8930	0.170726
PA-R368A	PA	1181	432	1614	0	0	27	0.000516194
PA-R368A	PA	1191	517	1709	0	0	17	0.000325011
PA-R368A	PA	20	1977	1998	0	0	18	0.000344129
PA-R368A	NS	22	423	446	27	0.00475358	341	0.00797898
PA-R368A	NS	73	355	429	0	0	19	0.000444577
PA-R368A	NP	1086	242	1329	2	0.000160303	45	0.0016902
PA-R368A	NP	823	311	1135	3	0.000240455	23	0.000863882
PA-R368A	NP	897	436	1334	0	0	21	0.000788762
PA-R368A	NP	888	438	1327	0	0	20	0.000751202
PA-R368A	NP	908	476	1385	0	0	16	0.000600961
PA-R368A	NA	564	283	848	6	0.000716984	62	0.00187487
PA-R368A	NA	162	582	745	2	0.000238995	36	0.00108863
PA-R368A	NA	207	582	790	181	0.021629	960	0.0290302
PA-R368A	NA	725	271	997	0	0	41	0.00123983
PA-R368A	M	74	353	428	0	0	14	6.87534e-05
PA-R368A	M	74	478	553	0	0	60	0.000294658
PA-R368A	HA	983	293	1277	63	0.00654048	773	0.0350309
PA-R368A	HA	296	736	1033	8	0.000830537	48	0.00217527
WT	PB2	1368	397	1766	1	4.22196e-05	15	0.000616963
WT	PB2	1401	424	1826	16	0.000675514	242	0.00995367
WT	PB2	1389	497	1887	1	4.22196e-05	32	0.00131619
WT	PB2	1062	559	1622	7	0.000295537	87	0.00357838
WT	PB2	1431	673	2105	1	4.22196e-05	150	0.00616963
WT	PB2	1828	228	2057	0	0	18	0.000740355
WT	PB2	1528	580	2109	0	0	16	0.000658094
WT	PB2	1303	620	1924	0	0	32	0.00131619
WT	PB2	1250	676	1927	0	0	14	0.000575832
WT	PB2	1334	742	2077	0	0	39	0.0016041
WT	PB1	1630	303	1934	4	0.000252199	151	0.0101543
WT	PB1	1725	314	2040	2	0.000126099	17	0.0011432
WT	PB1	1618	319	1938	11	0.000693546	372	0.0250159
WT	PB1	1552	327	1880	2	0.000126099	131	0.00880936
WT	PB1	1753	343	2097	8	0.000504397	405	0.0272351
WT	PB1	1544	347	1892	146	0.00920525	5011	0.336975
WT	PB1	1553	361	1915	3	0.000189149	15	0.00100871
WT	PB1	1298	429	1728	31	0.00195454	335	0.0225278
WT	PB1	1301	555	1857	1	6.30497e-05	14	0.000941459
WT	PB1	42	1982	2025	2	0.000126099	19	0.00127769
WT	PB1	2052	75	2128	0	0	18	0.00121045
WT	PB1	2029	134	2164	0	0	65	0.00437106
WT	PB1	2027	135	2163	0	0	317	0.0213173
WT	PB1	1961	146	2108	0	0	112	0.00753167
WT	PB1	1851	159	2011	0	0	76	0.00511078
WT	PB1	1879	166	2046	0	0	73	0.00490903
WT	PB1	1804	189	1994	0	0	29	0.00195016
WT	PB1	1933	193	2127	0	0	40	0.00268988
WT	PB1	1886	215	2102	0	0	16	0.00107595
WT	PB1	1928	256	2185	0	0	225	0.0151306
WT	PB1	1597	305	1903	0	0	25	0.00168118
WT	PB1	1701	315	2017	0	0	76	0.00511078
WT	PB1	1574	320	1895	0	0	32	0.00215191
WT	PB1	1576	350	1927	0	0	15	0.00100871
WT	PB1	1483	356	1840	0	0	24	0.00161393
WT	PB1	1487	366	1854	0	0	16	0.00107595
WT	PB1	25	2083	2109	0	0	73	0.00490903
WT	PB1	16	2228	2245	0	0	14	0.000941459
WT	PA	1737	205	1943	1	5.37572e-05	62	0.00276567
WT	PA	1699	244	1944	23	0.00123642	2648	0.118121
WT	PA	1644	257	1902	2	0.000107514	310	0.0138284
WT	PA	1563	270	1834	1	5.37572e-05	28	0.00124901
WT	PA	1605	276	1882	8	0.000430058	702	0.0313146
WT	PA	1634	284	1919	16	0.000860115	1719	0.0766805
WT	PA	1540	300	1841	18	0.00096763	1094	0.0488007
WT	PA	1331	366	1698	9	0.000483815	316	0.014096
WT	PA	1361	389	1751	4	0.000215029	37	0.00165048
WT	PA	1298	398	1697	3	0.000161272	18	0.000802937
WT	PA	1304	409	1714	2	0.000107514	41	0.00182891
WT	PA	1280	449	1730	5	0.000268786	31	0.00138284
WT	PA	1952	121	2074	0	0	103	0.00459459
WT	PA	1813	137	1951	0	0	68	0.00303332
WT	PA	1868	156	2025	0	0	133	0.00593281
WT	PA	1839	161	2001	0	0	25	0.00111519
WT	PA	1796	181	1978	0	0	14	0.000624507
WT	PA	1731	183	1915	0	0	16	0.000713722
WT	PA	1729	200	1930	0	0	29	0.00129362
WT	PA	1769	208	1978	0	0	40	0.0017843
WT	PA	1693	224	1918	0	0	39	0.0017397
WT	PA	1702	230	1933	0	0	15	0.000669114
WT	PA	1765	243	2009	0	0	45	0.00200734
WT	NS	73	355	429	0	0	19	0.000567843
WT	NP	915	479	1395	1	3.54949e-05	29	0.00113551
WT	NP	897	436	1334	0	0	36	0.0014096
WT	NP	888	438	1327	0	0	39	0.00152706
WT	NP	908	476	1385	0	0	33	0.00129213
WT	NP	913	487	1401	0	0	15	0.000587332
WT	NA	725	271	997	0	0	14	0.000490134
WT	M	74	353	428	0	0	49	0.000235565
WT	M	74	478	553	0	0	74	0.000355751
WT	M	141	511	653	0	0	28	0.000134608
WT	M	102	601	704	0	0	22	0.000105764
WT	M	44	619	664	0	0	24	0.000115379
WT	M	140	622	763	0	0	16	7.69191e-05
WT	M	63	639	703	0	0	19	9.13415e-05
WT	HA	1236	208	1445	5	0.00026177	85	0.00375423
WT	HA	1213	231	1445	2	0.000104708	42	0.00185503
