# Supplementary material
Source: HighWire-hosted journal article supplement (doi:10.1101/rna.077529.120)
Supplement: Supplemental_Table_S3.xlsx [file Supplemental_Table_S3.xlsx]

## Sheet: Table S3 Description
Supplemental Table S3 (related to Figure 4-5-6) ∣ Features of the DVGs detected upon RT-seq or RT-PCR-seq on vRNAs extracted from the PA-K635A, PA-R638A or WT viral stocks in experiment #1.
Tab "RT-seq" (related to Figure 4-5, left panels) ∣ Features of the DVGs detected upon RT-seq on vRNAs extracted from the PA-K635A, PA-R638A or WT viral stocks in experiment #1
Tab "RT-PCR-seq" (related to Figure 4-5, right panels) ∣ Features of the DVGs detected upon RT-PCR-seq on vRNAs extracted from the PA-K635A, PA-R638A or WT viral stocks in experiment #1
Tab "DVGs common to ≥2 viruses" (related to Figure 6) ∣ Features of DVGs with the exact same breakpoint start and end sites detected in 2 or 3 distinct viral stocks in experiment #1

## Sheet: RT–seq
Virus	Segment	Deletion length	Breakpoint start	Breakpoint end	Count	Frequency	Frame	Uncertainty	Uncertainty sequence	Junction sequence
PA-K635A	PB2	1816	192	2009	1493	0.0478022	1	3	cca	aatgaaatatccactaaaag
PA-K635A	PB2	1917	199	2117	30	0.000960526	0	0	NA	tatccaattatgggcaaaga
PA-K635A	PB2	1686	294	1981	284	0.00909298	0	1	a	agaccgagtgaattctccag
PA-K635A	PB2	1576	333	1910	85	0.00272149	1	0	NA	gaataggaataaagtggaat
PA-K635A	PB2	1467	360	1828	376	0.0120386	0	1	c	agttcattatcaacaaatga
PA-K635A	PB2	1255	496	1752	72	0.00230526	1	0	NA	ctcagtgccaggaatttgag
PA-K635A	PB2	1104	630	1735	236	0.00755614	0	3	atg	ttctcctctgatgctgtaca
PA-K635A	PB2	900	631	1532	25	0.000800439	0	2	tg	tctcctctgatgagagttag
PA-K635A	PB2	46	1782	1829	27	0.000864474	1	2	aa	tttagttccaaacaaatgag
PA-K635A	PB2	88	1810	1899	50	0.00160088	1	1	t	tacagtgggttccaccaaag
PA-K635A	PB2	72	1996	2069	29	0.000928509	0	1	a	ccagtattcaaaggcacagc
PA-K635A	PB1	1951	128	2080	57	0.00256561	1	0	NA	atgggacagggaacaaatgt
PA-K635A	PB1	875	128	1004	26	0.00117028	2	0	NA	atgggacagggaaatcagcc
PA-K635A	PB1	1541	254	1796	22	0.000990235	2	1	t	cagaagacaatctccgacgg
PA-K635A	PB1	237	296	534	18	0.000810192	0	5	aatgg	tattggaagcaatggagtca
PA-K635A	PB1	1410	395	1806	31	0.00139533	0	5	aggcc	agctgacacaaggcccaaat
PA-K635A	PB1	179	560	740	22	0.000990235	2	1	g	aagaagaaatgagcaattgc
PA-K635A	PB1	1297	577	1875	377	0.016969	1	1	t	acaactcatttgaggattac
PA-K635A	PB1	1257	574	1832	29	0.00130531	0	2	at	atcacaactcatctccacat
PA-K635A	PB1	1014	630	1645	33	0.00148535	0	0	NA	ggtgacacagccagcaaccg
PA-K635A	PB1	945	645	1591	26	0.00117028	0	1	a	aataggtaaaatgagtattg
PA-K635A	PB1	867	711	1579	171	0.00769682	0	2	ga	aatgaccaaagagtctgcgg
PA-K635A	PB1	761	781	1543	26	0.00117028	2	1	a	gggtttgtatatggagcttc
PA-K635A	PB1	649	807	1457	70	0.00315075	1	0	NA	agcaaggagtgcaagaaaaa
PA-K635A	PB1	259	921	1181	48	0.00216051	1	0	NA	tgaaatttctgaaagaagat
PA-K635A	PB1	155	954	1110	58	0.00261062	2	4	gaaa	caaatggaacgaaacttaga
PA-K635A	PB1	156	994	1151	40	0.00180043	0	0	NA	atgatcacattcgatttgaa
PA-K635A	PB1	376	997	1374	43	0.00193546	1	1	t	atcacatatatgtgaatgca
PA-K635A	PB1	313	1080	1394	20	0.000900213	1	5	aaggg	gagactgggaaagggattca
PA-K635A	PB1	109	1816	1926	32	0.00144034	1	2	ta	ggcccaaatttaaagacatt
PA-K635A	PA	1942	83	2026	28	0.0011023	1	1	a	cggaaaaggcatcgttcagg
PA-K635A	PA	1558	312	1871	676	0.0266126	1	0	NA	tatttgcaaccagaaacatg
PA-K635A	PA	1501	381	1883	336	0.0132276	1	0	NA	attcatcgaaccgttggaga
PA-K635A	PA	1323	386	1710	276	0.0108655	0	0	NA	tcgaaattggcttgtatgtg
PA-K635A	PA	1190	413	1604	120	0.00472413	2	0	NA	ttcacatatatcactgaccc
PA-K635A	PA	1199	474	1674	150	0.00590516	2	1	a	tttctcattcaagaagtgcc
PA-K635A	PA	966	501	1468	2279	0.089719	0	0	NA	cacaaaggccttgattccaa
PA-K635A	PA	895	554	1450	199	0.00783418	1	0	NA	ggctattcacgcaatggatg
PA-K635A	PA	1153	555	1709	65	0.0025589	1	0	NA	gctattcacctcttgtatgt
PA-K635A	PA	812	595	1408	180	0.00708619	2	0	NA	tgggattcctggggtgtaca
PA-K635A	PA	804	655	1460	27	0.00106293	0	0	NA	acaggaacaaatttccaatt
PA-K635A	PA	870	762	1633	17	0.000669251	0	1	t	gggcaagctttgggagaagt
PA-K635A	PA	47	1283	1331	17	0.000669251	2	2	aa	tgaccgattcaacacattgc
PA-K635A	PA	85	1873	1959	256	0.0100781	1	1	a	aacaaatcagattcaacagc
PA-K635A	PA	42	1945	1988	27	0.00106293	0	3	tgg	agaactttattggaaggatt
PA-K635A	NS	173	332	506	32	0.00150874	2	4	ttca	aaggcactggttcaccactg
PA-K635A	NP	1142	143	1286	53	0.00120567	2	1	t	gaaaaatgattacagagaaa
PA-K635A	NP	74	553	628	42	0.000955436	2	0	NA	atgcagggttagaatgatca
PA-K635A	NP	236	582	819	78	0.00177438	2	0	NA	tggggccgcatttagcacgg
PA-K635A	NP	11	627	639	16	0.000363976	2	1	a	ggaattgatcacgtgggatc
PA-K635A	NP	20	1063	1084	27	0.000614209	2	3	atc	gcatttgaagatcagaggga
PA-K635A	NA	765	193	959	80	0.00259595	0	1	g	ctataaagttgatggaacag
PA-K635A	NA	610	344	955	202	0.00655476	1	1	c	atttcatgttcaaagatgga
PA-K635A	NA	604	346	951	218	0.00707395	1	0	NA	ttcatgttctgtcccaaaga
PA-K635A	NA	37	731	769	21	0.000681436	1	2	aa	gcctcgtacaaatagagttg
PA-K635A	NA	456	870	1327	15	0.00048674	0	0	NA	acggttcgaatgtagattgg
PA-K635A	M	242	462	705	18	0.00054633	2	0	NA	catttggcctctggtctaaa
PA-K635A	M	76	501	578	25	0.000758792	1	0	NA	actcccagcaacagctaagg
PA-K635A	HA	936	368	1305	37	0.00133086	0	1	a	aggagatttcaaaaaagttg
PA-K635A	HA	420	696	1117	52	0.0018704	0	2	at	tcttcaaattatggatggta
PA-K635A	HA	326	699	1026	16	0.000575507	2	6	acagga	tcaaattataacaggactaa
PA-K635A	HA	74	788	863	59	0.00212218	2	0	NA	gctagaaccctgagtccggc
PA-K635A	HA	163	1041	1205	20	0.000719384	1	1	t	ctaagaaacatacaaacaag
PA-K635A	HA	69	1284	1354	28	0.00100714	0	0	NA	aacttagaaatgttagttct
PA-K635A	HA	21	1203	1225	23	0.000827292	0	3	tta	attaacaggattatcgagaa
PA-R368A	PB1	1244	524	1769	25	0.00305287	2	0	NA	tagacttcctaaacccattc
PA-R368A	PB1	27	794	822	27	0.0032971	0	0	NA	ttgttgagactgaacaatca
PA-R368A	PB1	12	939	952	85	0.0103798	0	3	aac	cactggagataacgaaaatc
PA-R368A	PA	1619	254	1874	20	0.00189477	2	2	aa	acagatttgaaaacatggcc
PA-R368A	PA	1466	364	1831	20	0.00189477	2	1	a	gattacaagaaaggagaaag
PA-R368A	PA	886	491	1378	73	0.00691591	1	2	ca	aggaaatggccattgcagag
PA-R368A	PA	1191	518	1710	886	0.0839383	0	0	NA	ctctcgatgacttgtatgtg
PA-R368A	PA	982	557	1540	334	0.0316427	1	2	aa	tattcaccataaaggaagat
PA-R368A	PA	1112	647	1760	319	0.0302216	2	0	NA	ttgaaatcactggaaatgag
PA-R368A	PA	805	770	1576	1625	0.15395	1	2	gt	tttctcaaatgtaaactttg
PA-R368A	NS	22	423	446	27	0.00475358	1	0	NA	ctgaaagcgagctggagact
PA-R368A	NA	207	582	790	181	0.021629	0	1	t	gagcagtggcttctcactac
PA-R368A	HA	983	293	1277	63	0.00654048	2	3	ctt	cgactcactgcttagaaaaa
WT	PA	1699	244	1944	23	0.00123642	1	1	a	cttttgaagcattggcaaag
WT	PA	1634	284	1919	16	0.000860115	2	1	c	gcacaatagcccattgggaa
WT	PA	1540	300	1841	18	0.00096763	1	1	a	agtaataaacacatgaccaa
WT	PB1	1544	347	1892	146	0.00920525	2	0	NA	cctcgtgtctgtttatgcaa
WT	PB1	1298	429	1728	31	0.00195454	2	1	a	tctaaataggacaaacccga
WT	PB2	1401	424	1826	16	0.000675514	0	4	tcca	tttggccctgtccaacaaat

## Sheet: RT–PCR–seq
Virus	Segment	Deletion length	Breakpoint start	Breakpoint end	Count	Frequency	Frame	Uncertainty	Uncertainty sequence	Junction sequence
PA-K635A	PB2	1816	191	2008	60	0.00089232	1	0	NA	caatgaaataaccactaaaa
PA-K635A	PB2	1816	192	2009	41657	0.619523	1	3	cca	aatgaaatatccactaaaag
PA-K635A	PB2	1917	199	2117	948	0.0140987	0	0	NA	tatccaattatgggcaaaga
PA-K635A	PB2	1816	196	2013	64	0.000951808	1	1	t	aaatatccaataaaagactc
PA-K635A	PB2	1751	248	2000	24	0.000356928	2	4	acaa	atgagcagggacaacaagac
PA-K635A	PB2	1686	294	1981	4823	0.0717277	0	1	a	agaccgagtgaattctccag
PA-K635A	PB2	1576	333	1910	928	0.0138012	1	0	NA	gaataggaataaagtggaat
PA-K635A	PB2	1421	351	1773	110	0.00163592	2	0	NA	gacaagtacatttagttcca
PA-K635A	PB2	1467	360	1828	3350	0.0498212	0	1	c	agttcattatcaacaaatga
PA-K635A	PB2	1331	440	1772	18	0.000267696	2	0	NA	ttagaaaccactttagttcc
PA-K635A	PB2	1255	496	1752	256	0.00380723	1	0	NA	ctcagtgccaggaatttgag
PA-K635A	PB2	1331	497	1829	15	0.00022308	2	1	a	tcagtgccaaaacaaatgag
PA-K635A	PB2	1366	514	1881	82	0.0012195	1	2	tc	caggatgtaatcttcccttc
PA-K635A	PB2	1303	620	1924	28	0.000416416	1	8	ttctcctc	gttgcaaaatttctcctcat
PA-K635A	PB2	1104	630	1735	715	0.0106335	0	3	atg	ttctcctctgatgctgtaca
PA-K635A	PB2	900	631	1532	65	0.000966681	0	2	tg	tctcctctgatgagagttag
PA-K635A	PB2	1284	670	1955	42	0.000624624	0	1	c	gtccgcaaaacaggaatgag
PA-K635A	PB2	1431	673	2105	26	0.000386672	0	8	gattcctc	cgcaaaacgagattcctcat
PA-K635A	PB2	1334	742	2077	15	0.00022308	2	5	gctgg	caaggaacatgctggagttg
PA-K635A	PB2	88	1810	1899	30	0.00044616	1	1	t	tacagtgggttccaccaaag
PA-K635A	PB1	1951	128	2080	1462	0.0836849	1	0	NA	atgggacagggaacaaatgt
PA-K635A	PB1	875	128	1004	34	0.00194616	2	0	NA	atgggacagggaaatcagcc
PA-K635A	PB1	1851	159	2011	35	0.0020034	0	6	acacat	tgtcaacaggacacattcct
PA-K635A	PB1	1768	211	1980	46	0.00263304	1	2	ca	gaaactggagcaaaaacatg
PA-K635A	PB1	1541	254	1796	151	0.00864324	2	1	t	cagaagacaatctccgacgg
PA-K635A	PB1	1410	395	1806	120	0.0068688	0	5	aggcc	agctgacacaaggcccaaat
PA-K635A	PB1	1393	476	1870	43	0.00246132	1	2	at	aagtgttcagatggatgagg
PA-K635A	PB1	1114	509	1624	31	0.00177444	1	0	NA	aatctggaagatgataaaca
PA-K635A	PB1	1301	555	1857	25	0.001431	2	7	gaaatgg	gaacaaagaagaaatgggaa
PA-K635A	PB1	179	560	740	15	0.0008586	2	1	g	aagaagaaatgagcaattgc
PA-K635A	PB1	1122	566	1689	28	0.00160272	0	2	ca	aaatggagatcaggtacacg
PA-K635A	PB1	1257	574	1832	151	0.00864324	0	2	at	atcacaactcatctccacat
PA-K635A	PB1	1297	577	1875	1998	0.114366	1	1	t	acaactcatttgaggattac
PA-K635A	PB1	1014	630	1645	89	0.00509436	0	0	NA	ggtgacacagccagcaaccg
PA-K635A	PB1	945	645	1591	65	0.0037206	0	1	a	aataggtaaaatgagtattg
PA-K635A	PB1	867	711	1579	310	0.0177444	0	2	ga	aatgaccaaagagtctgcgg
PA-K635A	PB1	761	781	1543	46	0.00263304	2	1	a	gggtttgtatatggagcttc
PA-K635A	PB1	649	807	1457	90	0.0051516	1	0	NA	agcaaggagtgcaagaaaaa
PA-K635A	PB1	259	921	1181	32	0.00183168	1	0	NA	tgaaatttctgaaagaagat
PA-K635A	PB1	155	954	1110	41	0.00234684	2	4	gaaa	caaatggaacgaaacttaga
PA-K635A	PB1	156	994	1151	25	0.001431	0	0	NA	atgatcacattcgatttgaa
PA-K635A	PB1	376	997	1374	30	0.0017172	1	1	t	atcacatatatgtgaatgca
PA-K635A	PB1	109	1816	1926	97	0.00555228	1	2	ta	ggcccaaatttaaagacatt
PA-K635A	PB1	29	83	113	16	0.00091584	2	1	a	ctataagcacacagccatgg
PA-K635A	PA	1942	83	2026	942	0.0192764	1	1	a	cggaaaaggcatcgttcagg
PA-K635A	PA	1829	128	1958	45	0.000920847	2	1	t	caaacaaatttattcaacag
PA-K635A	PA	1675	160	1836	17	0.000347876	1	0	NA	gaagtgtgctgaaagacatg
PA-K635A	PA	1558	312	1871	11592	0.23721	1	0	NA	tatttgcaaccagaaacatg
PA-K635A	PA	1558	313	1872	53	0.00108455	1	0	NA	atttgcaacaagaaacatgg
PA-K635A	PA	1646	351	1998	22	0.000450192	2	1	t	accagatttgttcagctgaa
PA-K635A	PA	1501	381	1883	4953	0.101355	1	0	NA	attcatcgaaccgttggaga
PA-K635A	PA	1501	382	1884	16	0.000327412	1	0	NA	ttcatcgaaacgttggagag
PA-K635A	PA	1323	386	1710	2880	0.0589342	0	0	NA	tcgaaattggcttgtatgtg
PA-K635A	PA	1190	413	1604	847	0.0173324	2	0	NA	ttcacatatatcactgaccc
PA-K635A	PA	983	455	1439	44	0.000900384	2	5	catcc	agaagacacacatcctgtgc
PA-K635A	PA	1199	474	1674	828	0.0169436	2	1	a	tttctcattcaagaagtgcc
PA-K635A	PA	966	500	1467	60	0.0012278	0	0	NA	ccacaaaggcattgattcca
PA-K635A	PA	966	501	1468	10699	0.218937	0	0	NA	cacaaaggccttgattccaa
PA-K635A	PA	966	502	1469	14	0.000286486	0	0	NA	acaaaggccgtgattccaat
PA-K635A	PA	895	554	1450	641	0.013117	1	0	NA	ggctattcacgcaatggatg
PA-K635A	PA	1153	555	1709	305	0.0062413	1	0	NA	gctattcacctcttgtatgt
PA-K635A	PA	812	595	1408	522	0.0106818	2	0	NA	tgggattcctggggtgtaca
PA-K635A	PA	804	655	1460	45	0.000920847	0	0	NA	acaggaacaaatttccaatt
PA-K635A	PA	870	762	1633	39	0.000798068	0	1	t	gggcaagctttgggagaagt
PA-K635A	PA	47	1283	1331	17	0.000347876	2	2	aa	tgaccgattcaacacattgc
PA-K635A	PA	85	1873	1959	148	0.00302856	1	1	a	aacaaatcagattcaacagc
PA-K635A	PA	42	1945	1988	57	0.00116641	0	3	tgg	agaactttattggaaggatt
PA-K635A	NS	226	317	544	14	0.000299347	1	7	atgtcaa	tcttgaggaaatgtcaaaaa
PA-K635A	NS	173	332	506	68	0.00145397	2	4	ttca	aaggcactggttcaccactg
PA-K635A	NS	73	355	429	31	0.000662839	1	4	agtg	ccaagcagaaagtgtgattt
PA-K635A	NS	63	352	416	14	0.000299347	0	5	gaaag	tgcccaagcagaaagcgaac
PA-K635A	NS	121	409	531	20	0.000427638	1	8	catactga	ataagaacatcatactgatg
PA-K635A	NS	12	609	622	19	0.000406256	0	0	NA	gttcgagtctagagattcgc
PA-K635A	NP	1142	143	1286	197	0.00534044	2	1	t	gaaaaatgattacagagaaa
PA-K635A	NP	897	436	1334	39	0.00105724	0	4	ctgg	gatgcaacggctgggaatac
PA-K635A	NP	888	438	1327	27	0.000731939	0	1	g	tgcaacggctgcattcactg
PA-K635A	NP	915	479	1395	30	0.000813265	0	5	tgcaa	atttgaatgatgcaagacca
PA-K635A	NP	74	553	628	39	0.00105724	2	0	NA	atgcagggttagaatgatca
PA-K635A	NP	236	582	819	76	0.00206027	2	0	NA	tggggccgcatttagcacgg
PA-K635A	NP	11	627	639	20	0.000542177	2	1	a	ggaattgatcacgtgggatc
PA-K635A	NP	20	1063	1084	26	0.00070483	2	3	atc	gcatttgaagatcagaggga
PA-K635A	NA	765	193	959	289	0.00754742	0	1	g	ctataaagttgatggaacag
PA-K635A	NA	725	271	997	51	0.0013319	2	6	agcaaa	ggctatacacagcaaacgga
PA-K635A	NA	610	344	955	659	0.0172102	1	1	c	atttcatgttcaaagatgga
PA-K635A	NA	604	346	951	686	0.0179153	1	0	NA	ttcatgttctgtcccaaaga
PA-K635A	NA	37	731	769	29	0.000757353	1	2	aa	gcctcgtacaaatagagttg
PA-K635A	M	74	353	428	22	9.89414e-05	2	6	atgggg	ataacattccatgggggctg
PA-K635A	M	252	397	650	16	7.19574e-05	0	5	gccag	tggtgcacttgccaggcaaa
PA-K635A	M	242	462	705	146	0.000656611	2	0	NA	catttggcctctggtctaaa
PA-K635A	M	74	478	553	116	0.000521691	2	7	gaacaga	cgcaacctgtgaacagaatg
PA-K635A	M	76	501	578	244	0.00109735	1	0	NA	actcccagcaacagctaagg
PA-K635A	M	141	511	653	31	0.000139417	0	12	aggcaaatggtg	tcggtctcataggcaaatgg
PA-K635A	M	34	894	929	20	8.99468e-05	1	5	gaggg	ggtttgaaaagagggaagaa
PA-K635A	M	25	749	775	42	0.000188888	1	1	a	gcctatcagaattcaagtga
PA-K635A	HA	936	368	1305	116	0.0030868	0	1	a	aggagatttcaaaaaagttg
PA-K635A	HA	420	696	1117	89	0.00236832	0	2	at	tcttcaaattatggatggta
PA-K635A	HA	74	788	863	75	0.00199577	2	0	NA	gctagaaccctgagtccggc
PA-K635A	HA	163	1041	1205	20	0.000532206	1	1	t	ctaagaaacatacaaacaag
PA-K635A	HA	69	1284	1354	16	0.000425765	0	0	NA	aacttagaaatgttagttct
PA-K635A	HA	21	1203	1225	21	0.000558817	0	3	tta	attaacaggattatcgagaa
PA-R368A	PB2	2010	115	2126	26	0.00183249	0	0	NA	catatggccaaagacaggag
PA-R368A	PB2	1616	244	1861	22	0.00155057	2	1	a	agaaatgagcaccgctcaga
PA-R368A	PB2	1599	301	1901	14	0.000986724	0	4	cacc	gtgatggtatcaccaaagca
PA-R368A	PB2	1607	406	2014	37	0.00260777	2	1	a	aggttaaaacaaaagactca
PA-R368A	PB2	1569	424	1994	42	0.00296017	0	2	tc	tttggccctgtcaactacaa
PA-R368A	PB2	1303	620	1924	41	0.00288969	1	8	ttctcctc	gttgcaaaatttctcctcat
PA-R368A	PB2	1431	673	2105	41	0.00288969	0	8	gattcctc	cgcaaaacgagattcctcat
PA-R368A	PB2	1334	742	2077	27	0.00190297	2	5	gctgg	caaggaacatgctggagttg
PA-R368A	PB1	1852	134	1987	264	0.0352817	1	2	at	caggaacaggatggagtatg
PA-R368A	PB1	1851	159	2011	33	0.00441022	0	6	acacat	tgtcaacaggacacattcct
PA-R368A	PB1	1244	524	1769	386	0.0515862	2	0	NA	tagacttcctaaacccattc
PA-R368A	PB1	1301	555	1857	15	0.00200464	2	7	gaaatgg	gaacaaagaagaaatgggaa
PA-R368A	PB1	27	794	822	30	0.00400929	0	0	NA	ttgttgagactgaacaatca
PA-R368A	PB1	12	939	952	55	0.00735036	0	3	aac	cactggagataacgaaaatc
PA-R368A	PA	1863	162	2026	335	0.00640463	0	2	at	agtgtgcttcatcgttcagg
PA-R368A	PA	1619	254	1874	479	0.00915766	2	2	aa	acagatttgaaaacatggcc
PA-R368A	PA	1485	278	1764	16	0.000305893	0	3	aat	gagatcgcacaatgaggcgt
PA-R368A	PA	1466	364	1831	538	0.0102856	2	1	a	gattacaagaaaggagaaag
PA-R368A	PA	1181	432	1614	27	0.000516194	2	2	aa	aaaggccaataagacttgaa
PA-R368A	PA	886	491	1378	595	0.0113754	1	2	ca	aggaaatggccattgcagag
PA-R368A	PA	1191	518	1710	18557	0.354778	0	0	NA	ctctcgatgacttgtatgtg
PA-R368A	PA	1191	519	1711	34	0.000650022	0	0	NA	tctcgatgaattgtatgtga
PA-R368A	PA	1191	517	1709	17	0.000325011	0	0	NA	actctcgatgtcttgtatgt
PA-R368A	PA	982	557	1540	3297	0.063033	1	2	aa	tattcaccataaaggaagat
PA-R368A	PA	1069	562	1632	15	0.000286774	1	1	a	accataagacatgggagaag
PA-R368A	PA	1112	647	1760	4003	0.0765305	2	0	NA	ttgaaatcactggaaatgag
PA-R368A	PA	805	770	1576	8930	0.170726	1	2	gt	tttctcaaatgtaaactttg
PA-R368A	PA	20	1977	1998	18	0.000344129	2	1	t	cttgtatgcattcagctgaa
PA-R368A	NS	73	355	429	19	0.000444577	1	4	agtg	ccaagcagaaagtgtgattt
PA-R368A	NS	22	423	446	341	0.00797898	1	0	NA	ctgaaagcgagctggagact
PA-R368A	NP	1086	242	1329	45	0.0016902	0	0	NA	tagagagaatattcactggg
PA-R368A	NP	823	311	1135	23	0.000863882	1	0	NA	ggaaagatcccaaattgctt
PA-R368A	NP	897	436	1334	21	0.000788762	0	4	ctgg	gatgcaacggctgggaatac
PA-R368A	NP	888	438	1327	20	0.000751202	0	1	g	tgcaacggctgcattcactg
PA-R368A	NP	908	476	1385	16	0.000600961	2	5	tgatg	ccaatttgaatgatggaaag
PA-R368A	NA	725	271	997	41	0.00123983	2	6	agcaaa	ggctatacacagcaaacgga
PA-R368A	NA	564	283	848	62	0.00187487	0	0	NA	caaagacaatagagacaatt
PA-R368A	NA	162	582	745	36	0.00108863	0	0	NA	gagcagtggccgagaagggg
PA-R368A	NA	207	582	790	960	0.0290302	0	1	t	gagcagtggcttctcactac
PA-R368A	M	74	353	428	14	6.87534e-05	2	6	atgggg	ataacattccatgggggctg
PA-R368A	M	74	478	553	60	0.000294658	2	7	gaacaga	cgcaacctgtgaacagaatg
PA-R368A	HA	983	293	1277	773	0.0350309	2	3	ctt	cgactcactgcttagaaaaa
PA-R368A	HA	296	736	1033	48	0.00217527	2	0	NA	caaggcccaataagaaacat
WT	PB2	1828	228	2057	18	0.000740355	1	0	NA	ggaaatgattaagacccaga
WT	PB2	1368	397	1766	15	0.000616963	0	0	NA	aaagtcgaaattcagtcttt
WT	PB2	1401	424	1826	242	0.00995367	0	4	tcca	tttggccctgtccaacaaat
WT	PB2	1389	497	1887	32	0.00131619	0	0	NA	tcagtgccaacttcgcagcc
WT	PB2	1062	559	1622	87	0.00357838	0	5	catcg	aggatactaacatcgtcaat
WT	PB2	1528	580	2109	16	0.000658094	1	1	c	caactaacgacctcattctg
WT	PB2	1303	620	1924	32	0.00131619	1	8	ttctcctc	gttgcaaaatttctcctcat
WT	PB2	1431	673	2105	150	0.00616963	0	8	gattcctc	cgcaaaacgagattcctcat
WT	PB2	1250	676	1927	14	0.000575832	2	5	tcctc	aaaacgagattcctcattga
WT	PB2	1334	742	2077	39	0.0016041	2	5	gctgg	caaggaacatgctggagttg
WT	PB1	2052	75	2128	18	0.00121045	0	1	a	acaaaatgctagcagttcat
WT	PB1	2027	135	2163	317	0.0213173	2	2	ta	aggaacaggatatggtggag
WT	PB1	2029	134	2164	65	0.00437106	1	2	at	caggaacaggatggtggagg
WT	PB1	1961	146	2108	112	0.00753167	2	2	ta	acaccatggatatttgaaaa
WT	PB1	1879	166	2046	73	0.00490903	1	0	NA	aggacacatccttgaataca
WT	PB1	1851	159	2011	76	0.00511078	0	6	acacat	tgtcaacaggacacattcct
WT	PB1	1804	189	1994	29	0.00195016	1	1	a	gggaagatggatgatgctgt
WT	PB1	1933	193	2127	40	0.00268988	1	2	ca	agatggacaacagcagttca
WT	PB1	1886	215	2102	16	0.00107595	2	6	gcaact	ctggagcaccgcaacttatt
WT	PB1	1928	256	2185	225	0.0151306	2	1	a	gaagacaatgagagcccgaa
WT	PB1	1630	303	1934	151	0.0101543	1	2	tt	agcaatggccttgaatcagt
WT	PB1	1597	305	1903	25	0.00168118	1	2	cc	caatggccttccactgaacc
WT	PB1	1725	314	2040	17	0.0011432	0	4	atcc	tccttgaggaatccatcttg
WT	PB1	1701	315	2017	76	0.00511078	0	3	tcc	ccttgaggaatcctggatcc
WT	PB1	1618	319	1938	372	0.0250159	1	3	atc	gaggaatcccatcagtgaac
WT	PB1	1574	320	1895	32	0.00215191	2	1	t	aggaatcccatatgcaaccc
WT	PB1	1552	327	1880	131	0.00880936	1	2	at	ccatcctggtattaccaggg
WT	PB1	1753	343	2097	405	0.0272351	1	2	gt	gagacctcgtgtgctgcaac
WT	PB1	1544	347	1892	5011	0.336975	2	0	NA	cctcgtgtctgtttatgcaa
WT	PB1	1483	356	1840	24	0.00161393	1	0	NA	ttgaaacgatattcctgaag
WT	PB1	1553	361	1915	15	0.00100871	2	2	tt	acgatggaggtttgtcaacc
WT	PB1	1487	366	1854	16	0.00107595	2	1	c	ggaggttgttcttgaaatgg
WT	PB1	1576	350	1927	15	0.00100871	1	2	aa	cgtgtcttgaaaagacattg
WT	PB1	1298	429	1728	335	0.0225278	2	1	a	tctaaataggacaaacccga
WT	PB1	1301	555	1857	14	0.000941459	2	7	gaaatgg	gaacaaagaagaaatgggaa
WT	PB1	42	1982	2025	19	0.00127769	0	0	NA	gtccagccaaccccaaaaga
WT	PB1	25	2083	2109	73	0.00490903	1	1	a	gaagatgaacatttgaaaaa
WT	PB1	16	2228	2245	14	0.000941459	1	1	a	ctggaaggatactgagatca
WT	PA	1952	121	2074	103	0.00459459	2	0	NA	atcgaaacaaggggggctat
WT	PA	1813	137	1951	68	0.00303332	1	1	a	ttgcagcaataagtcggtat
WT	PA	1868	156	2025	133	0.00593281	2	1	t	cttggaagtgtatcgttcag
WT	PA	1839	161	2001	25	0.00111519	0	0	NA	aagtgtgcttagctgaatca
WT	PA	1796	181	1978	14	0.000624507	2	2	tc	gattttcacttctccacaac
WT	PA	1731	183	1915	16	0.000713722	0	0	NA	ttttcacttcggttccattg
WT	PA	1729	200	1930	29	0.00129362	1	3	gtc	agcaaggcgagtctgcagaa
WT	PA	1737	205	1943	62	0.00276567	0	2	ta	ggcgagtcaatattggcaaa
WT	PA	1769	208	1978	40	0.0017843	2	2	tc	gagtcaatagtctccacaac
WT	PA	1693	224	1918	39	0.0017397	1	4	tcca	aacttggcgatccattggga
WT	PA	1699	244	1944	2648	0.118121	1	1	a	cttttgaagcattggcaaag
WT	PA	1765	243	2009	45	0.00200734	1	2	ca	acttttgaagcaagaaaact
WT	PA	1702	230	1933	15	0.000669114	1	4	tgca	gcgatccaaatgcagaactt
WT	PA	1644	257	1902	310	0.0138284	0	1	a	gatttgaaataggagtggag
WT	PA	1563	270	1834	28	0.00124901	0	2	ga	cgagggaagagagaaagaca
WT	PA	1605	276	1882	702	0.0313146	0	0	NA	aagagatcgccccgttggag
WT	PA	1634	284	1919	1719	0.0766805	2	1	c	gcacaatagcccattgggaa
WT	PA	1540	300	1841	1094	0.0488007	1	1	a	agtaataaacacatgaccaa
WT	PA	1331	366	1698	316	0.014096	2	2	aa	ttacaagaagaaggcctatg
WT	PA	1361	389	1751	37	0.00165048	2	2	aa	aaattggagtaatgggggat
WT	PA	1298	398	1697	18	0.000802937	2	0	NA	taacaaggagcaaggcctat
WT	PA	1304	409	1714	41	0.00182891	2	3	tat	gaagttcacatatgtgagga
WT	PA	1280	449	1730	31	0.00138284	2	2	ga	aatctgagaagaacctcaaa
WT	NS	73	355	429	19	0.000567843	1	4	agtg	ccaagcagaaagtgtgattt
WT	NP	897	436	1334	36	0.0014096	0	4	ctgg	gatgcaacggctgggaatac
WT	NP	888	438	1327	39	0.00152706	0	1	g	tgcaacggctgcattcactg
WT	NP	915	479	1395	29	0.00113551	0	5	tgcaa	atttgaatgatgcaagacca
WT	NP	908	476	1385	33	0.00129213	2	5	tgatg	ccaatttgaatgatggaaag
WT	NP	913	487	1401	15	0.000587332	1	6	accaga	gatgcaacttaccagaagat
WT	NA	725	271	997	14	0.000490134	2	6	agcaaa	ggctatacacagcaaacgga
WT	M	74	353	428	49	0.000235565	2	6	atgggg	ataacattccatgggggctg
WT	M	74	478	553	74	0.000355751	2	7	gaacaga	cgcaacctgtgaacagaatg
WT	M	141	511	653	28	0.000134608	0	12	aggcaaatggtg	tcggtctcataggcaaatgg
WT	M	102	601	704	22	0.000105764	0	5	gctgg	ggagcaaatggctggtctaa
WT	M	44	619	664	24	0.000115379	2	4	gcag	gagtgagcaagcaggcgatg
WT	M	63	639	703	19	9.13415e-05	0	4	tgct	ccatggatattgctggtcta
WT	M	140	622	763	16	7.69191e-05	2	5	gcaga	tgagcaagcagcagatgcaa
WT	HA	1236	208	1445	85	0.00375423	0	3	taa	ggaaactatgtaatgccaaa
WT	HA	1213	231	1445	42	0.00185503	1	2	ta	atagccccactaatgccaaa

## Sheet: DVGs common to ≥ 2  viruses 
Virus	Segment	Deletion length	Breakpoint Start	Breakpoint End	Count	Frequency	Frame	Uncertainty	uncertainty sequence	Junction sequence
PA-K635A	NP	888	438	1327	27	0.000731939	0	1	g	tgcaacggctgcattcactg
PA-R638A	NP	888	438	1327	20	0.000751202	0	1	g	tgcaacggctgcattcactg
WT	NP	888	438	1327	39	0.00152706	0	1	g	tgcaacggctgcattcactg
PA-K635A	NS	73	355	429	31	0.000662839	1	4	agtg	ccaagcagaaagtgtgattt
PA-R638A	NS	73	355	429	19	0.000444577	1	4	agtg	ccaagcagaaagtgtgattt
WT	NS	73	355	429	19	0.000567843	1	4	agtg	ccaagcagaaagtgtgattt
PA-K635A	NP	897	436	1334	39	0.00105724	0	4	ctgg	gatgcaacggctgggaatac
PA-R638A	NP	897	436	1334	21	0.000788762	0	4	ctgg	gatgcaacggctgggaatac
WT	NP	897	436	1334	36	0.0014096	0	4	ctgg	gatgcaacggctgggaatac
PA-K635A	PB2	1334	742	2077	15	0.00022308	2	5	gctgg	caaggaacatgctggagttg
PA-R638A	PB2	1334	742	2077	27	0.00190297	2	5	gctgg	caaggaacatgctggagttg
WT	PB2	1334	742	2077	39	0.0016041	2	5	gctgg	caaggaacatgctggagttg
PA-R638A	NP	908	476	1385	16	0.000600961	2	5	tgatg	ccaatttgaatgatggaaag
WT	NP	908	476	1385	33	0.00129213	2	5	tgatg	ccaatttgaatgatggaaag
PA-K635A	NP	915	479	1395	30	0.000813265	0	5	tgcaa	atttgaatgatgcaagacca
WT	NP	915	479	1395	29	0.00113551	0	5	tgcaa	atttgaatgatgcaagacca
PA-K635A	PB1	1851	159	2011	35	0.0020034	0	6	acacat	tgtcaacaggacacattcct
PA-R638A	PB1	1851	159	2011	33	0.00441022	0	6	acacat	tgtcaacaggacacattcct
WT	PB1	1851	159	2011	76	0.00511078	0	6	acacat	tgtcaacaggacacattcct
PA-K635A	NA	725	271	997	51	0.0013319	2	6	agcaaa	ggctatacacagcaaacgga
PA-R638A	NA	725	271	997	41	0.00123983	2	6	agcaaa	ggctatacacagcaaacgga
WT	NA	725	271	997	14	0.000490134	2	6	agcaaa	ggctatacacagcaaacgga
PA-K635A	M	74	353	428	22	9.89414e-05	2	6	atgggg	ataacattccatgggggctg
PA-R638A	M	74	353	428	14	6.87534e-05	2	6	atgggg	ataacattccatgggggctg
WT	M	74	353	428	49	0.000235565	2	6	atgggg	ataacattccatgggggctg
PA-R638A	PB1	1301	555	1857	15	0.00200464	2	7	gaaatgg	gaacaaagaagaaatgggaa
WT	PB1	1301	555	1857	14	0.000941459	2	7	gaaatgg	gaacaaagaagaaatgggaa
PA-K635A	M	74	478	553	116	0.000521691	2	7	gaacaga	cgcaacctgtgaacagaatg
PA-R638A	M	74	478	553	60	0.000294658	2	7	gaacaga	cgcaacctgtgaacagaatg
WT	M	74	478	553	74	0.000355751	2	7	gaacaga	cgcaacctgtgaacagaatg
PA-K635A	PB2	1431	673	2105	26	0.000386672	0	8	gattcctc	cgcaaaacgagattcctcat
PA-R638A	PB2	1431	673	2105	41	0.00288969	0	8	gattcctc	cgcaaaacgagattcctcat
WT	PB2	1431	673	2105	150	0.00616963	0	8	gattcctc	cgcaaaacgagattcctcat
PA-K635A	PB2	1303	620	1924	28	0.000416416	1	8	ttctcctc	gttgcaaaatttctcctcat
PA-R638A	PB2	1303	620	1924	41	0.00288969	1	8	ttctcctc	gttgcaaaatttctcctcat
WT	PB2	1303	620	1924	32	0.00131619	1	8	ttctcctc	gttgcaaaatttctcctcat
PA-K635A	M	141	511	653	31	0.000139417	0	12	aggcaaatggtg	tcggtctcataggcaaatgg
WT	M	141	511	653	28	0.000134608	0	12	aggcaaatggtg	tcggtctcataggcaaatgg
